# Supplementary material for: Hybrid chalcogen bonds in prodrug nanoassemblies provides dual redox-responsivity in the tumor microenvironment
Source: Nat Commun. 2022 Nov 24;13:7228. doi: 10.1038/s41467-022-35033-7 (PMC9700694; doi:10.1038/s41467-022-35033-7)
Supplement: Supplementary file 1 — Supplementary Information [file 41467_2022_35033_MOESM1_ESM.pdf]

## **Supplementary Information**

### **Hybrid Chalcogen Bonds in Prodrug Nanoassemblies Provides Dual Redox-Responsivity in the Tumour Microenvironment**

**Liu et al.**

## Supplementary Figures

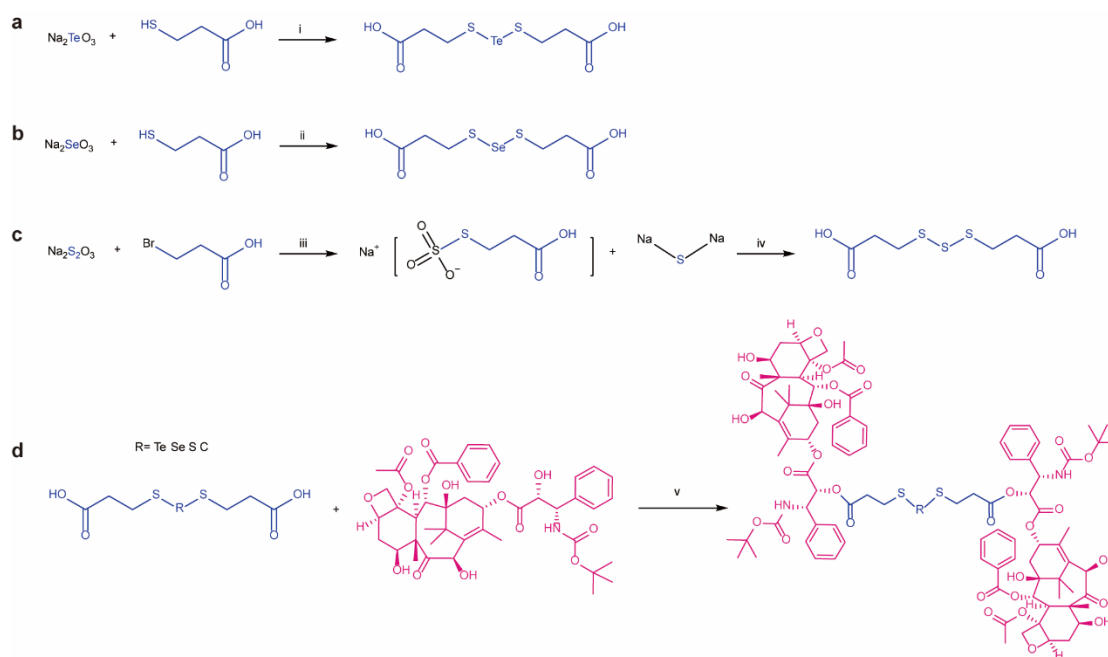

**Supplementary Figure 1.** Synthetic routes of prodrugs. **a** The synthetic of 3,3'-(telluriumdithio)-dipropionic acid **b** The synthetic of 3,3'-(selenodithio)-dipropionic acid. **c** The synthetic of 3,3'-trithiodipropionic acid. **d** The synthetic of DTX homodimeric prodrugs. Reagents and condition: (i)  $\text{H}_2\text{O}$ ,  $25^\circ\text{C}$ ; (ii)  $0.5 \text{ mol L}^{-1} \text{H}_2\text{SO}_4$ ,  $25^\circ\text{C}$ ; (iii)  $\text{H}_2\text{O}$ ,  $50\text{-}60^\circ\text{C}$ ; (iv)  $\text{H}_2\text{O}$ ,  $25^\circ\text{C}$ ; (v) EDCI, DMAP,  $\text{CHCl}_3$ ,  $25^\circ\text{C}$ .

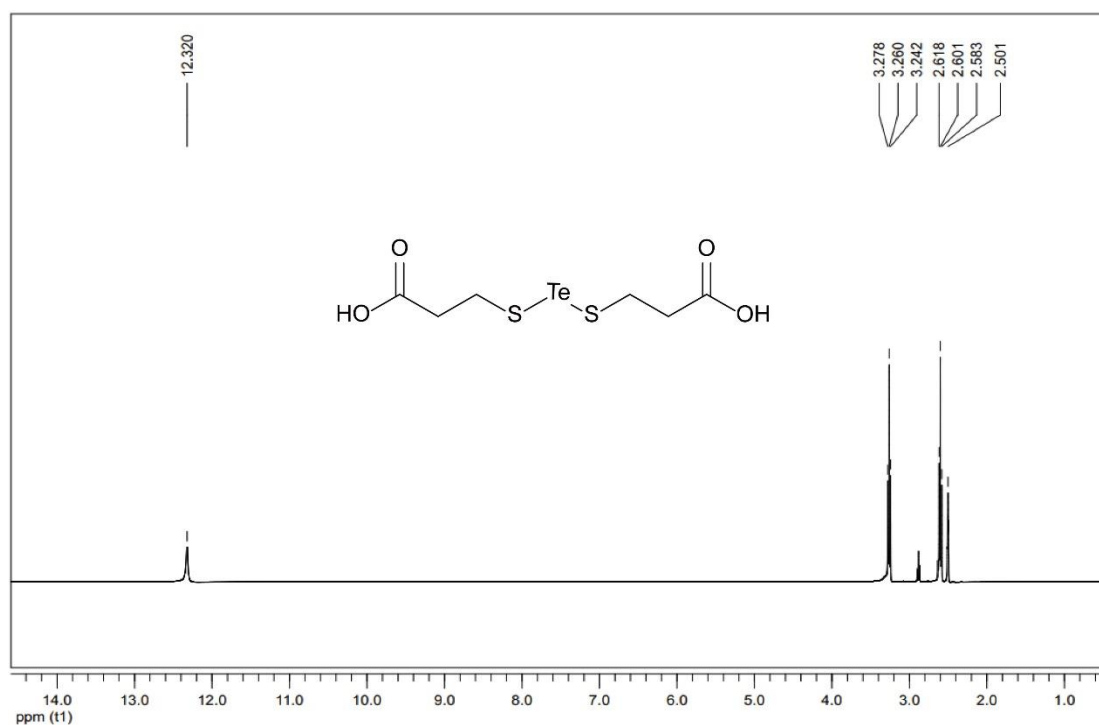

**Supplementary Figure 2.** <sup>1</sup>H NMR spectrum of 3,3'-(telluriumdithio)-dipropionic acid. <sup>1</sup>H NMR (400 MHz, DMSO-d<sub>6</sub>) δ ppm 12.32 (s, 2H, -COOH), 3.26 (t, J = 7.12 Hz, 4H, COOHCH<sub>2</sub>CH<sub>2</sub>STeSCH<sub>2</sub>CH<sub>2</sub>COOH), 2.60 (t, J = 7.11 Hz, 4H, COOHCH<sub>2</sub>CH<sub>2</sub>STeSCH<sub>2</sub>CH<sub>2</sub>COOH).

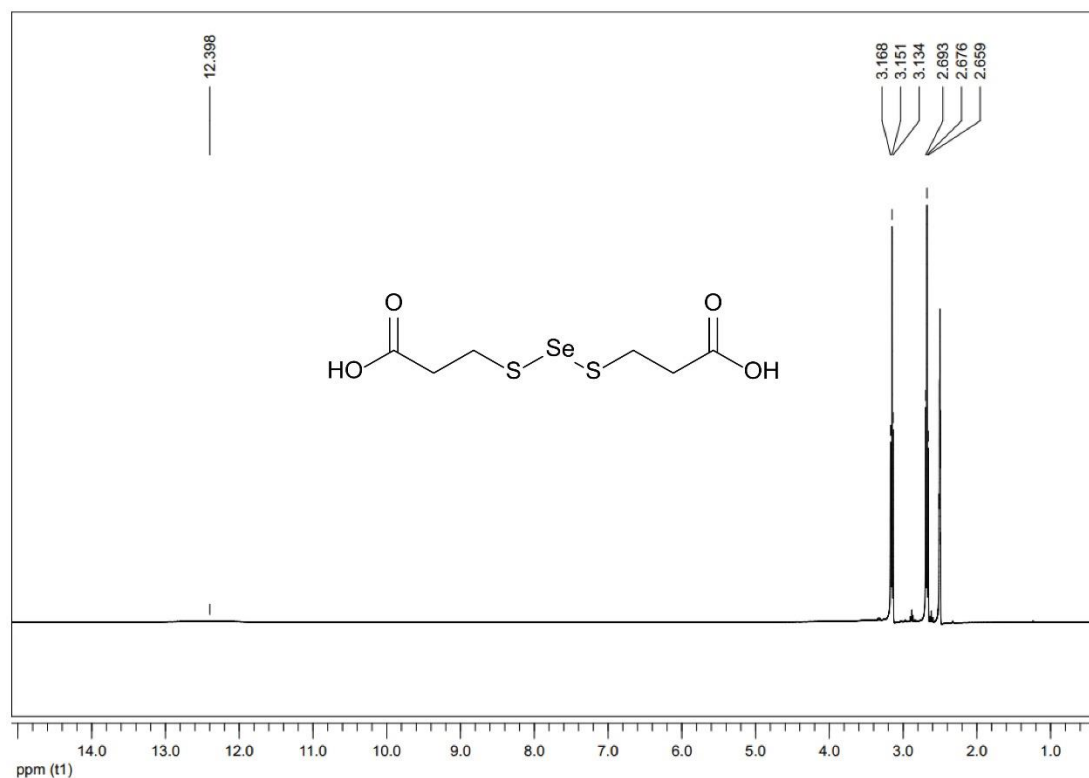

**Supplementary Figure 3.** <sup>1</sup>H NMR spectrum of 3,3'-(selenodithio)-dipropionic acid.

<sup>1</sup>H NMR (400 MHz, DMSO-d<sub>6</sub>) δ ppm 12.63-12.13 (m, 2H, -COOH), 3.15 (t, J = 6.97 Hz, 4H, COOHCH<sub>2</sub>CH<sub>2</sub>SSeSCH<sub>2</sub>CH<sub>2</sub>CH<sub>2</sub>COOH), 2.68 (t, J = 6.96 Hz, 4H, COOHCH<sub>2</sub>CH<sub>2</sub>SSeSCH<sub>2</sub>CH<sub>2</sub>CH<sub>2</sub>COOH).

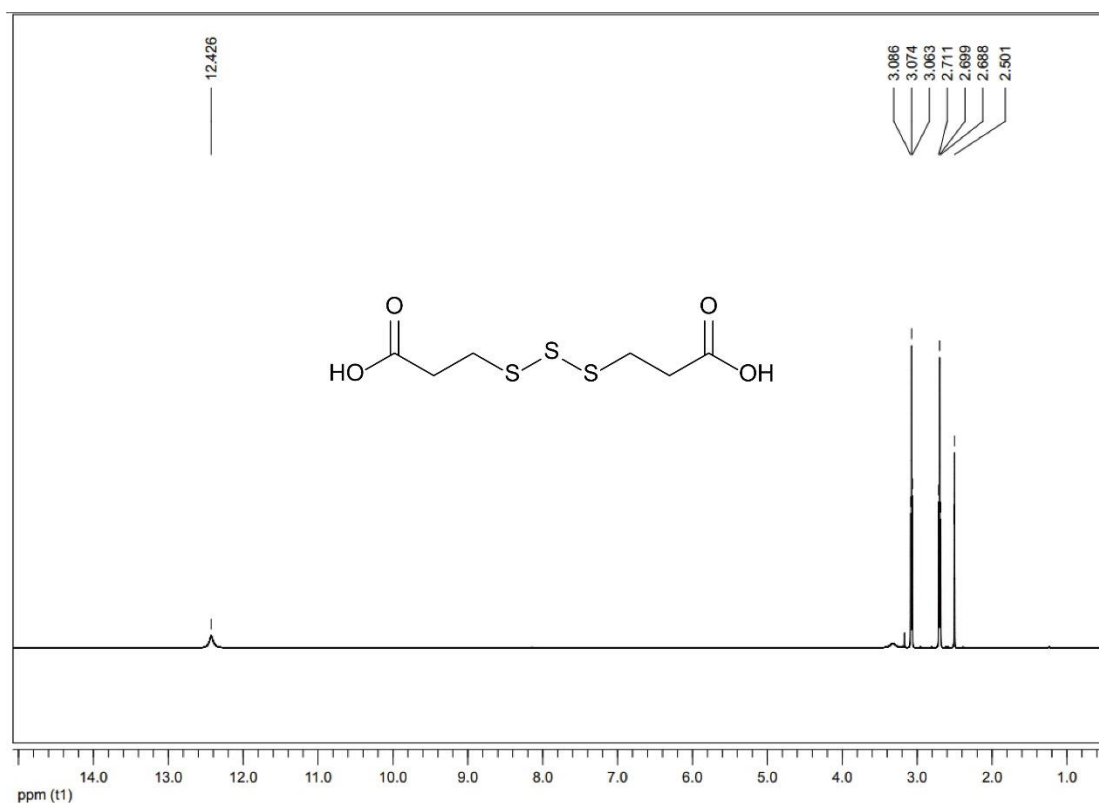

**Supplementary Figure 4.** <sup>1</sup>H NMR spectrum of 3,3'-trithiodipropionic acid.

<sup>1</sup>H NMR (600 MHz, DMSO-d<sub>6</sub>) δ ppm 12.43 (s, -COOH, 2H), 3.07 (t, J = 6.92 Hz, 4H, COOHCH<sub>2</sub>CH<sub>2</sub>SSSCH<sub>2</sub>CH<sub>2</sub>COOH), 2.70 (t, J = 6.92 Hz, 4H, COOHCH<sub>2</sub>CH<sub>2</sub>SSS CH<sub>2</sub>CH<sub>2</sub>COOH).

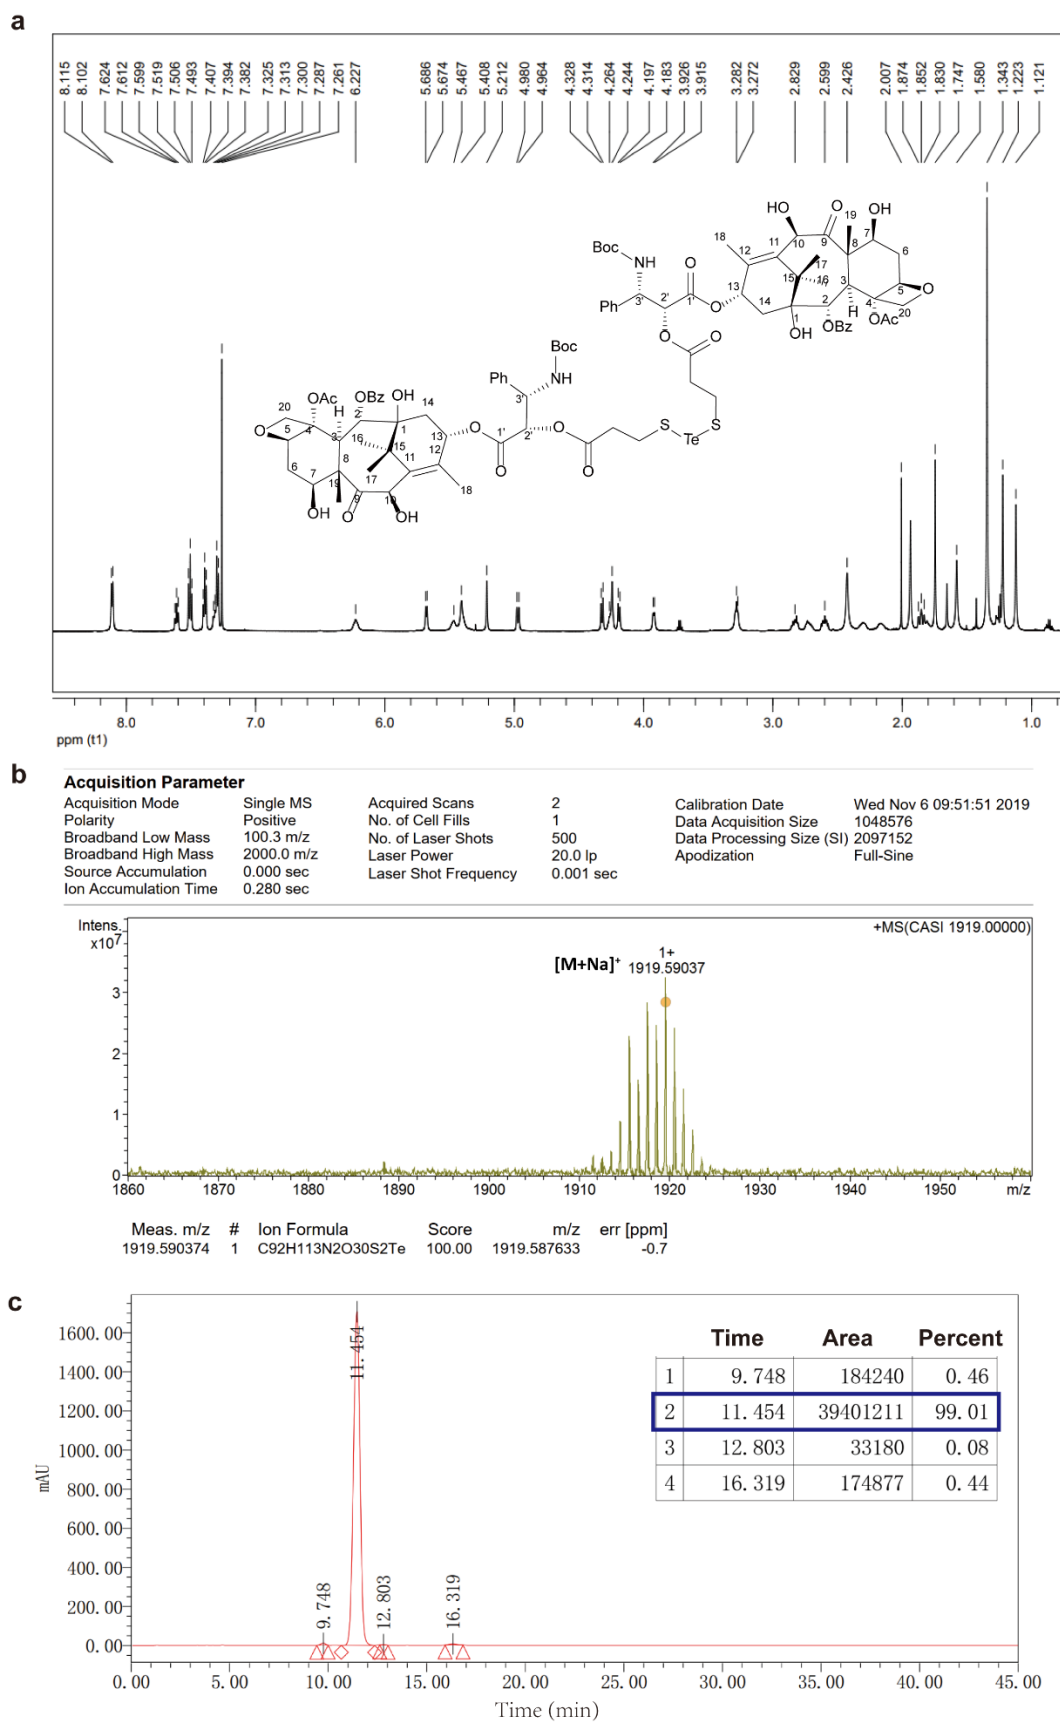

**Supplementary Figure 5.** Characterizations of DTX-StES-DTX. **a** <sup>1</sup>H NMR spectrum.

**b** Mass spectrum. **c** The purity.

$^1\text{H}$  NMR (600 MHz,  $\text{CDCl}_3$ )  $\delta$  ppm 8.11 (d,  $J = 7.61$  Hz, 4H, Ar-H), 7.61 (t,  $J = 7.37$  Hz, 2H, Ar-H), 7.51 (t,  $J = 7.72$  Hz, 4H, Ar-H), 7.39 (t,  $J = 7.53$  Hz, 4H, Ar-H), 7.31 (dd,  $J = 15.15, 7.34$  Hz, 6H, Ar-H), 6.23 (s, 2H, 13-CH), 5.68 (d,  $J = 6.90$  Hz, 2H, 2-CH), 5.47 (s, 2H, 3'-CH), 5.41 (s, 2H, 10-CH), 5.21 (s, 2H, 2'-CH), 4.97 (d,  $J = 9.21$  Hz, 2H, 5-CH), 4.32 (d,  $J = 8.55$  Hz, 2H, 20-CH $_2$ - $\alpha$ H), 4.25 (d,  $J = 12.02$  Hz, 2H, 7-CH), 4.19 (d,  $J = 8.48$  Hz, 2H, 20-CH $_2$ - $\beta$ H), 3.92 (d,  $J = 6.31$  Hz, 2H, 3-CH), 3.28 (s, 4H, CH $_2$ CH $_2$ STeSCH $_2$ CH $_2$ ), 2.86-2.79 (m, 2H, CH $_2$ CH $_2$ STeSCH $_2$ CH $_2$ - $\alpha$ H), 2.63-2.56 (m, 2H, CH $_2$ CH $_2$ STeSCH $_2$ CH $_2$ - $\beta$ H), 2.43 (s, 6H, -OAc), 2.01 (s, 2H, 6-CH $_2$ - $\alpha$ H), 1.88-1.83 (m, 2H, 6-CH $_2$ - $\beta$ H), 1.75 (s, 6H, 19-CH $_3$ ), 1.58 (s, 4H, 14-CH $_2$ ), 1.34 (s, 18H, -Boc), 1.22 (s, 6H, 16-CH $_3$ ), 1.12 (s, 6H, 17-CH $_3$ ).

HRMS calcd. for  $\text{C}_{92}\text{H}_{112}\text{N}_2\text{O}_{30}\text{S}_2\text{Te}$ , (ESI)  $m/z$   $[\text{M}+\text{Na}]^+ = 1919.59037$ .

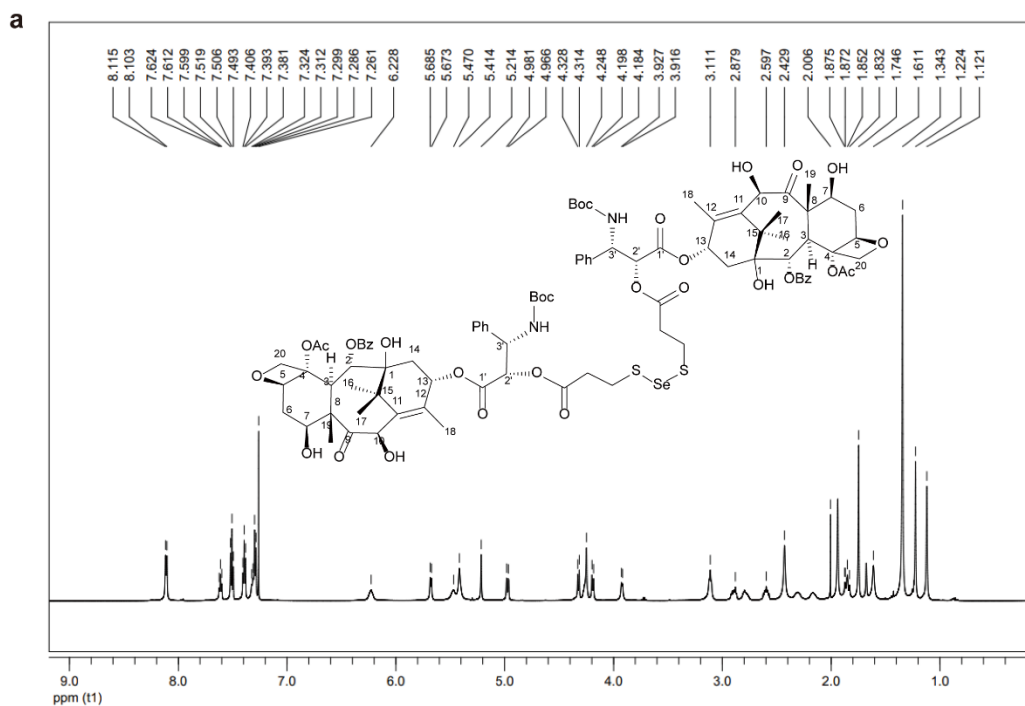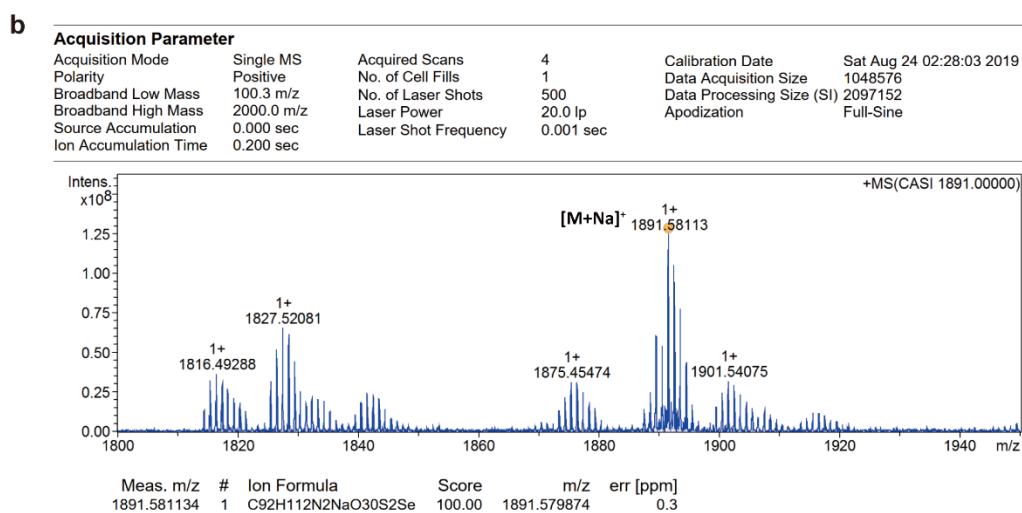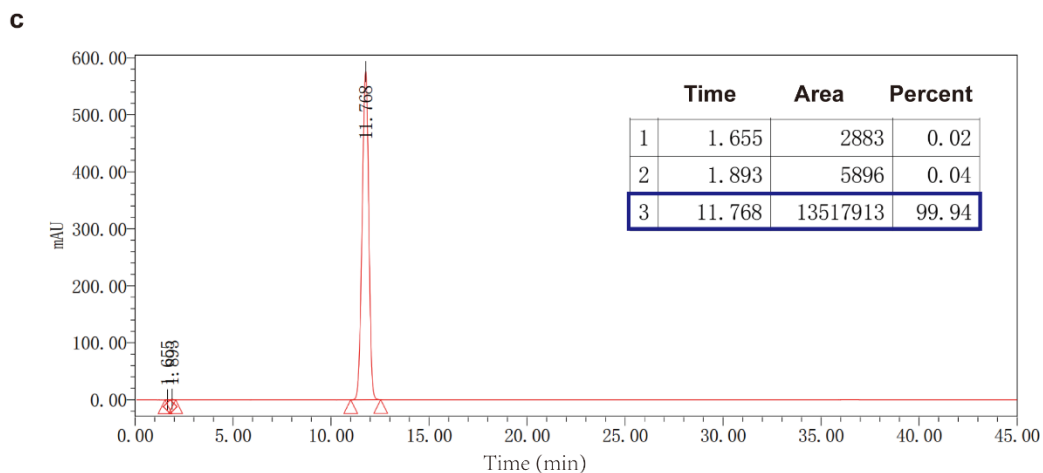

**Supplementary Figure 6.** Characterizations of DTX-SSeS-DTX. **a** <sup>1</sup>H NMR spectrum.

**b** Mass spectrum. **c** The purity.

$^1\text{H}$  NMR (600 MHz,  $\text{CDCl}_3$ )  $\delta$  ppm 8.109 (d,  $J = 7.55$  Hz, 4H, Ar-H), 7.612 (t,  $J = 7.30$  Hz, 2H, Ar-H), 7.506 (t,  $J = 7.74$  Hz, 4H, Ar-H), 7.393 (t,  $J = 7.54$  Hz, 4H, Ar-H), 7.305 (dd,  $J = 15.57, 7.36$  Hz, 6H, Ar-H), 6.228 (s, 2H, 13-CH), 5.679 (d,  $J = 6.82$  Hz, 2H, 2-CH), 5.470 (s, 2H, 3'-CH), 5.414 (s, 2H, 10-CH), 5.214 (s, 2H, 2'-CH), 4.974 (d,  $J = 9.21$  Hz, 2H, 5-CH), 4.321 (d,  $J = 8.53$  Hz, 2H, 20-CH<sub>2</sub>- $\alpha$ H), 4.248 (s, 2H, 7-CH), 4.191 (d,  $J = 8.51$  Hz, 2H, 20-CH<sub>2</sub>- $\beta$ H), 3.921 (d,  $J = 6.11$  Hz, 2H, 3-CH), 3.111 (s, 4H, CH<sub>2</sub>CH<sub>2</sub>SSeSCH<sub>2</sub>CH<sub>2</sub>CH<sub>2</sub>), 2.934-2.856 (m, 2H, CH<sub>2</sub>CH<sub>2</sub>SSeSCH<sub>2</sub>CH<sub>2</sub>- $\alpha$ H), 2.643-2.564 (m, 2H, CH<sub>2</sub>CH<sub>2</sub>SSeSCH<sub>2</sub>CH<sub>2</sub>- $\beta$ H), 2.429 (s, 6H, -OAc), 2.006 (s, 2H, 6-CH<sub>2</sub>- $\alpha$ H), 1.858 (dd, 2H, 6-CH<sub>2</sub>- $\beta$ H), 1.746 (s, 6H, 19-CH<sub>3</sub>), 1.611 (s, 4H, 14-CH<sub>2</sub>), 1.343 (s, 18H, -Boc), 1.232 (d, 6H, 16-CH<sub>3</sub>), 1.121 (s, 6H, 17-CH<sub>3</sub>)

HRMS calcd. for  $\text{C}_{92}\text{H}_{112}\text{N}_2\text{O}_{30}\text{S}_2\text{Se}$ , (ESI)  $m/z$   $[\text{M}+\text{Na}]^+ = 1891.58113$ .

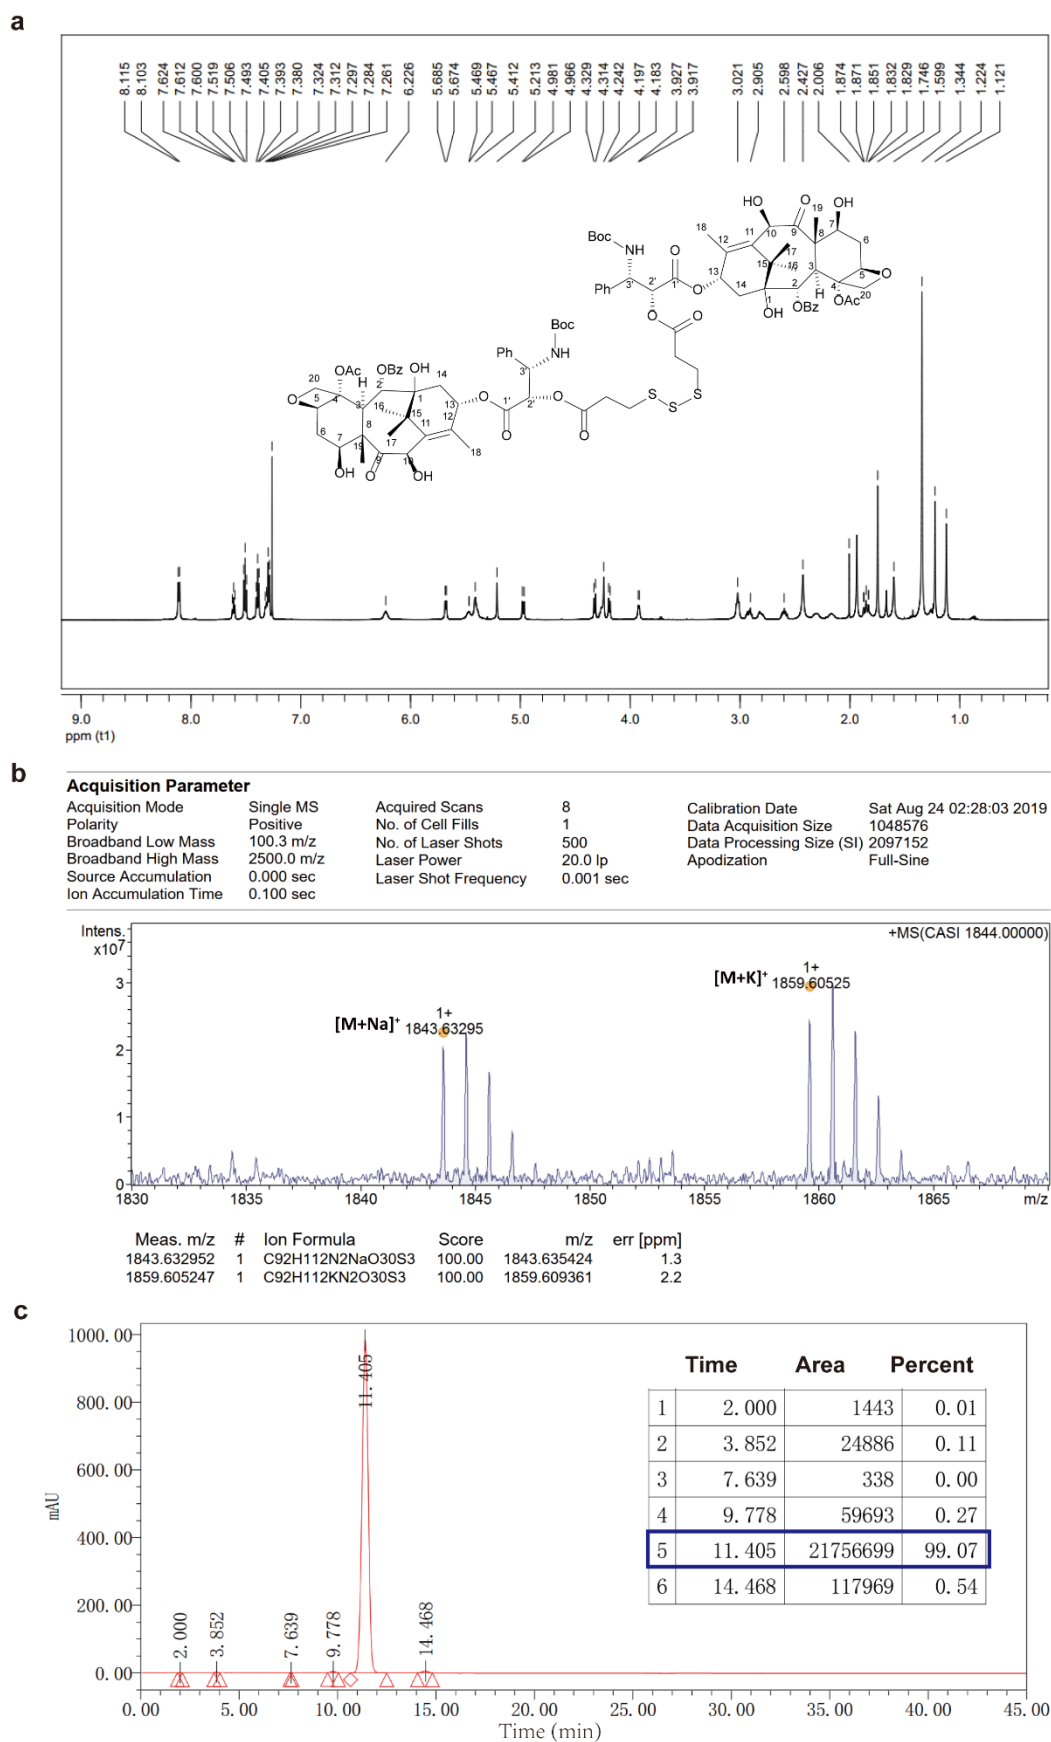

**Supplementary Figure 7.** Characterizations of DTX-SSS-DTX. **a**  $^1\text{H}$  NMR spectrum.

**b** Mass spectrum. **c** The purity.

$^1\text{H}$  NMR (600 MHz,  $\text{CDCl}_3$ )  $\delta$  ppm 8.109 (d,  $J = 7.59$  Hz, 4H, Ar-H), 7.612 (t,  $J = 7.36$  Hz, 2H, Ar-H), 7.506 (t,  $J = 7.74$  Hz, 4H, Ar-H), 7.393 (t,  $J = 7.56$  Hz, 4H, Ar-H), 7.304 (dd,  $J = 16.65, 7.32$  Hz, 6H, Ar-H), 6.226 (s, 2H, 13-CH), 5.680 (d,  $J = 6.90$  Hz, 2H, 2-CH), 5.468 (d,  $J = 0.90$  Hz, 2H, 3'-CH), 5.412 (s, 2H, 10-CH), 5.213 (s, 2H, 2'-CH), 4.973 (d,  $J = 9.01$  Hz, 2H, 5-CH), 4.322 (d,  $J = 8.54$  Hz, 2H, 20- $\text{CH}_2$ - $\alpha$ H), 4.285-4.222 (m, 2H, 7-CH), 4.190 (d,  $J = 8.51$  Hz, 2H, 20- $\text{CH}_2$ - $\beta$ H), 3.922 (d,  $J = 6.33$  Hz, 2H, 3-CH), 3.016 (d, 4H,  $\text{CH}_2\text{CH}_2\text{SSSCH}_2\text{CH}_2$ ), 2.919 (td, 2H,  $\text{CH}_2\text{CH}_2\text{SSSCH}_2\text{CH}_2$ - $\alpha$ H), 2.636-2.566 (m, 2H,  $\text{CH}_2\text{CH}_2\text{SSSCH}_2\text{CH}_2$ - $\beta$ H), 2.427 (s, 6H, -OAc), 2.006 (s, 2H, 6- $\text{CH}_2$ - $\alpha$ H), 1.884-1.816 (m, 2H, 6- $\text{CH}_2$ - $\beta$ H), 1.746 (s, 6H, 19- $\text{CH}_3$ ), 1.599 (s, 4H, 14- $\text{CH}_2$ ), 1.344 (s, 18H, -Boc), 1.253-1.204 (m, 6H, 16- $\text{CH}_3$ ), 1.121 (s, 6H, 17- $\text{CH}_3$ )

HRMS calcd. for  $\text{C}_{92}\text{H}_{112}\text{N}_2\text{O}_{30}\text{S}_3$ , (ESI)  $m/z$   $[\text{M}+\text{Na}]^+ = 1843.63295$ ,  $[\text{M}+\text{K}]^+ = 1859.60525$ .

**a**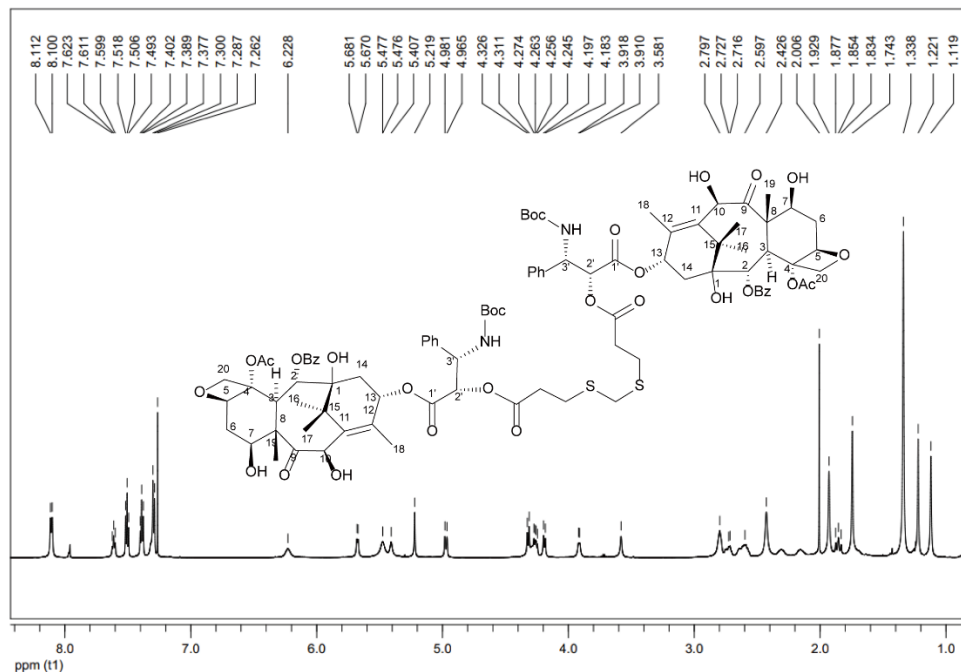**b**

| Acquisition Parameter |            |                      |           |                           |                          |
|-----------------------|------------|----------------------|-----------|---------------------------|--------------------------|
| Acquisition Mode      | Single MS  | Acquired Scans       | 8         | Calibration Date          | Thu Dec 12 09:38:20 2019 |
| Polarity              | Positive   | No. of Cell Fills    | 1         | Data Acquisition Size     | 1048576                  |
| Broadband Low Mass    | 100.3 m/z  | No. of Laser Shots   | 500       | Data Processing Size (SI) | 2097152                  |
| Broadband High Mass   | 2000.0 m/z | Laser Power          | 20.0 lp   | Apodization               | Full-Sine                |
| Source Accumulation   | 0.000 sec  | Laser Shot Frequency | 0.001 sec |                           |                          |
| Ion Accumulation Time | 0.200 sec  |                      |           |                           |                          |

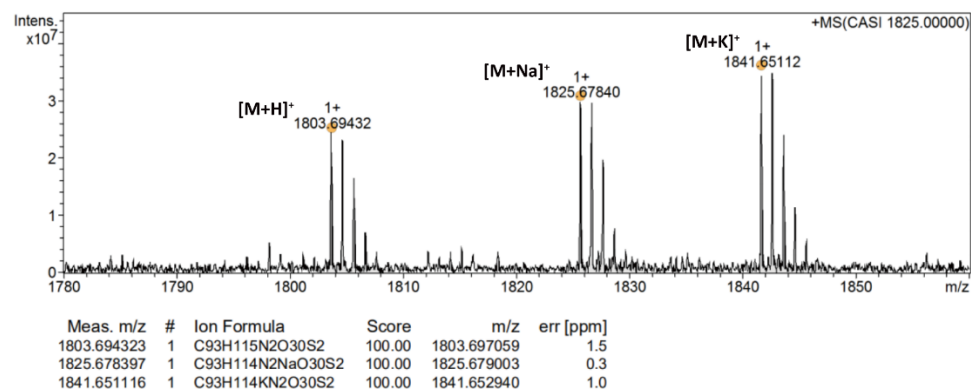**c**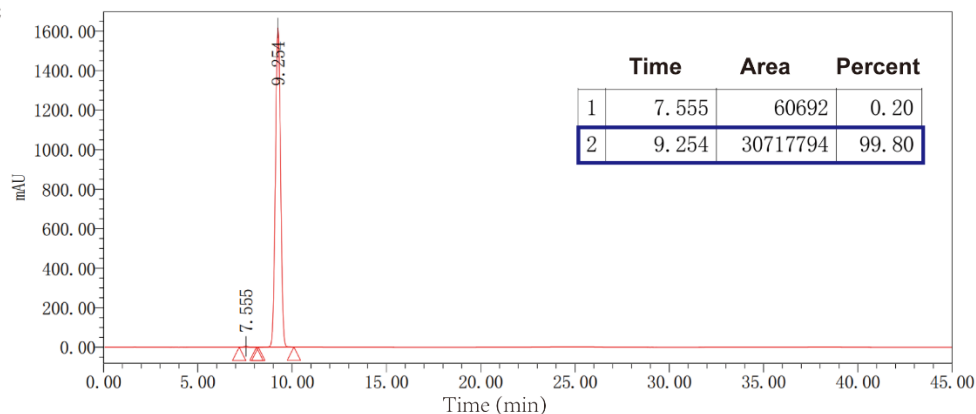

**Supplementary Figure 8.** Characterizations of DTX-SCS-DTX. **a**  $^1\text{H}$  NMR spectrum.

**b** Mass spectrum. **c** The purity.

$^1\text{H}$  NMR (600 MHz,  $\text{CDCl}_3$ )  $\delta$  ppm 8.106 (d,  $J = 7.49$  Hz, 4H, Ar-H), 7.611 (t,  $J = 7.18$  Hz, 2H, Ar-H), 7.506 (t,  $J = 7.68$  Hz, 4H, Ar-H), 7.389 (t,  $J = 7.54$  Hz, 4H, Ar-H), 7.293 (d,  $J = 8.00$  Hz, 6H, Ar-H), 6.228 (s, 2H, 13-CH), 5.675 (d,  $J = 6.37$  Hz, 2H, 2-CH), 5.477 (d,  $J = 0.68$  Hz, 2H), 5.407 (s, 2H, 10-CH), 5.219 (s, 2H, 2'-CH), 4.973 (d,  $J = 9.36$  Hz, 2H, 5-CH), 4.319 (d,  $J = 8.55$  Hz, 2H, 20-CH $_2$ - $\alpha$ H), 4.260 (dd,  $J = 10.84$ , 6.74 Hz, 2H, 7-CH), 4.190 (d,  $J = 8.43$  Hz, 2H, 20-CH $_2$ - $\beta$ H), 3.914 (d,  $J = 4.94$  Hz, 2H, 3-CH), 3.581 (s, 4H, CH $_2$ CH $_2$ SCH $_2$ SCH $_2$ CH $_2$ ), 2.797 (s, 2H, CH $_2$ CH $_2$ SCH $_2$ SCH $_2$ CH $_2$ ), 2.797-2.716 (m, 2H, CH $_2$ CH $_2$ SCH $_2$ SCH $_2$ CH $_2$ - $\alpha$ H) 2.619-2.564 (m, 2H, CH $_2$ CH $_2$ SCH $_2$ SCH $_2$ CH $_2$ - $\beta$ H), 2.426 (s, 6H, -OAc), 2.001 (d,  $J = 5.26$  Hz, 2H, 6-CH $_2$ - $\alpha$ H), 1.929 (s, 4H, 14-CH $_2$ ), 1.885-1.823 (m, 2H, 6-CH $_2$ - $\beta$ H), 1.743 (s, 6H, 19-CH $_3$ ), 1.338 (s, 18H, -Boc), 1.221 (s, 6H, 16-CH $_3$ ), 1.119 (s, 6H, 17-CH $_3$ )

HRMS calcd. for  $\text{C}_{93}\text{H}_{114}\text{N}_2\text{O}_{30}\text{S}_2$ , (ESI)  $m/z$   $[\text{M}+\text{H}]^+ = 1803.69432$ ,  $[\text{M}+\text{Na}]^+ = 1825.67840$ ,  $[\text{M}+\text{K}]^+ = 1841.65112$ .

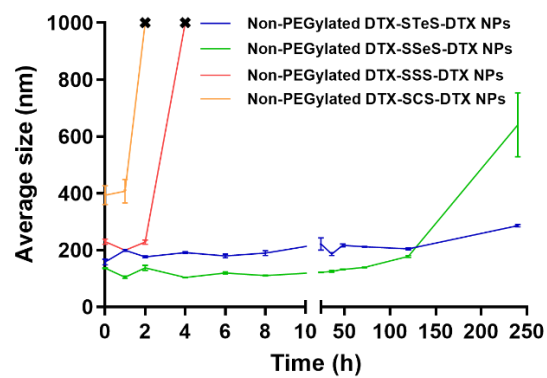

**Supplementary Figure 9.** Non-PEGylated HPNAs stored at room temperature for 240 h. Data are presented as mean  $\pm$  SD ( $n = 3$  independent experiments). Source data are provided as a Source Data file.

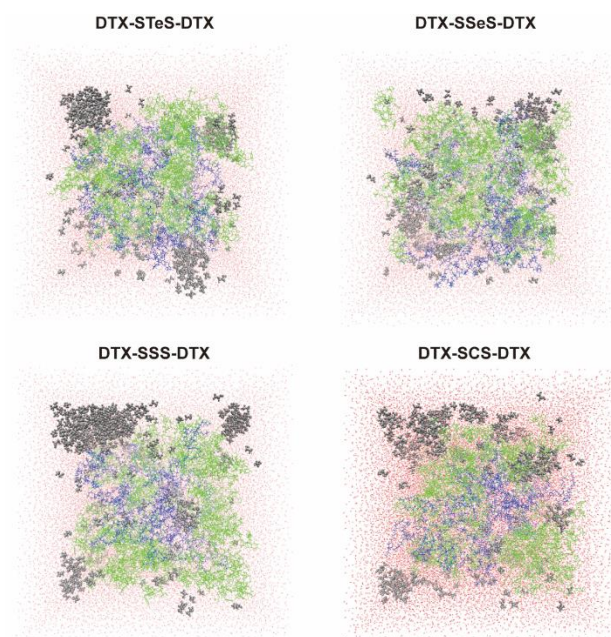

**Supplementary Figure 10.** The initial conformation of the system. The red represents water, the gray structure represents ethanol, the blue structure represents DSPE-PEG<sub>2K</sub>, and the green structure represents prodrugs.

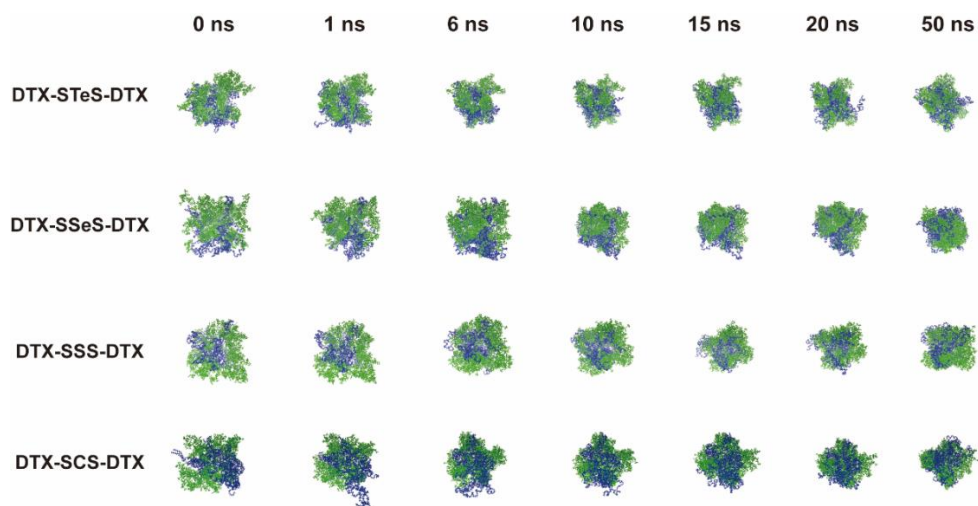

**Supplementary Figure 11.** Track of self-assembly conformation of prodrug in the system with time. The blue structure represents DSPE-PEG<sub>2K</sub>, and the green structure represents prodrugs.

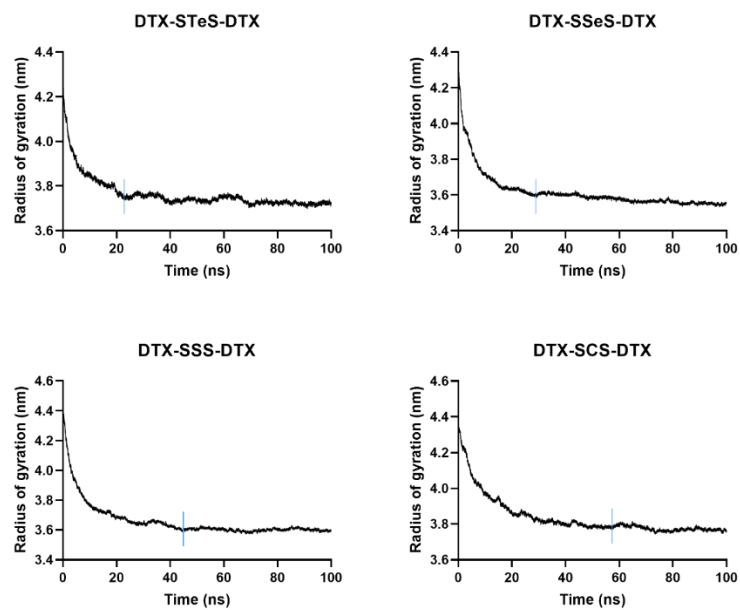

**Supplementary Figure 12.** The radius of gyration of prodrug and DSPE-PEG<sub>2K</sub> during aggregation. Source data are provided as a Source Data file.

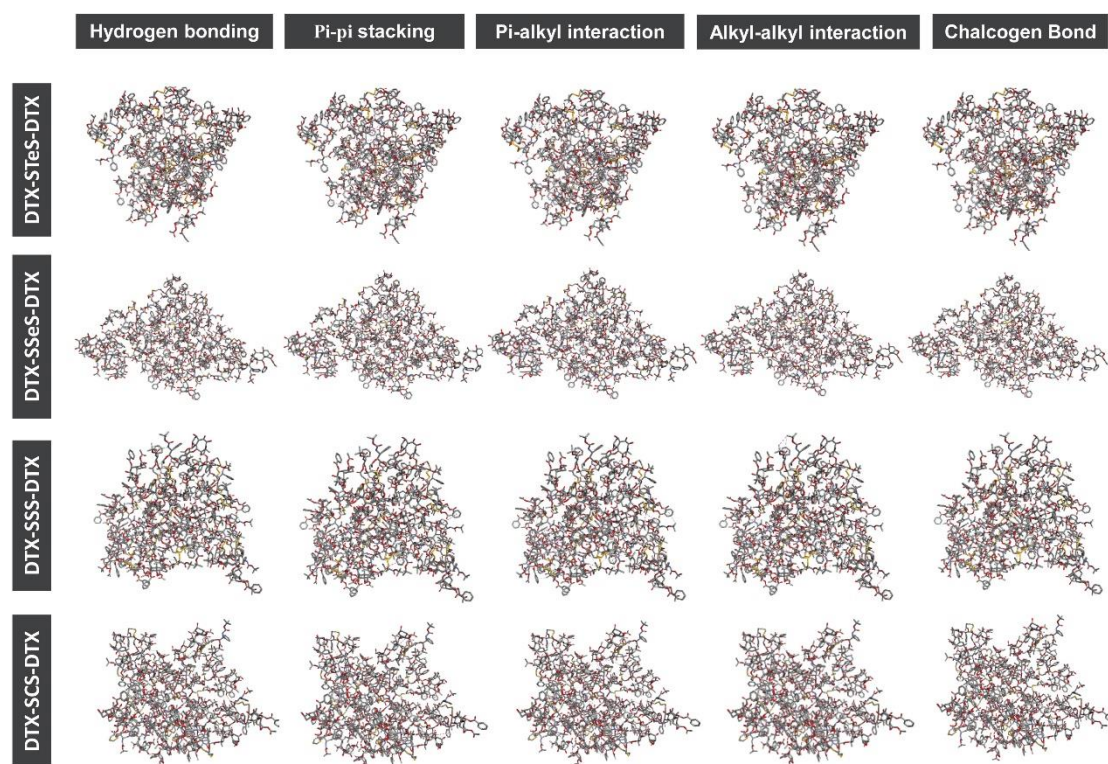

**Supplementary Figure 13.** Noncovalent interactions in determining the conformational stability of HPNAs.

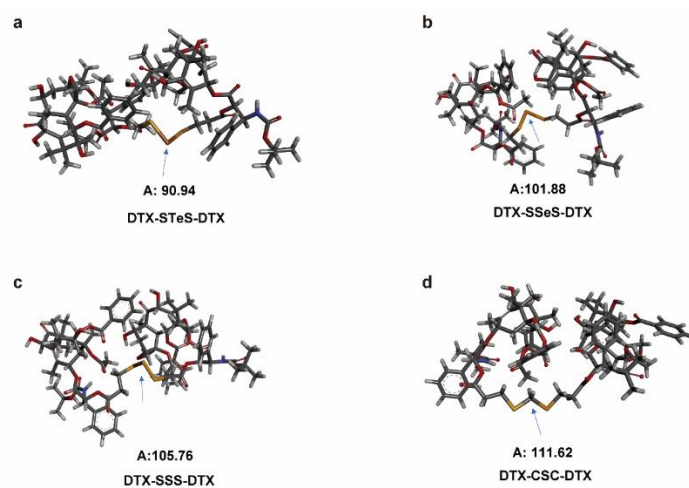

**Supplementary Figure 14.** The optimized geometry structure and bond angles of prodrugs. **a** DTX-STeS-DTX, **b** DTX-SSeS-DTX, **c** DTX-SSS-DTX, and **d** DTX-SCs-DTX.

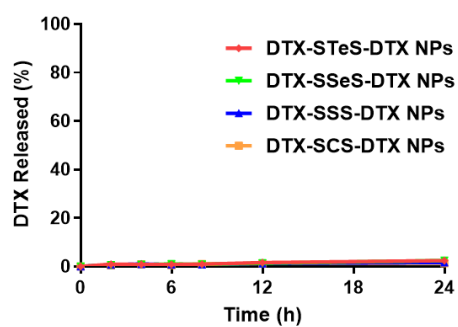

**Supplementary Figure 15.** In vitro drug release of HPNAs in the medium without redox substance. Data are presented as mean  $\pm$  SD (n = 3 independent experiments). Source data are provided as a Source Data file.

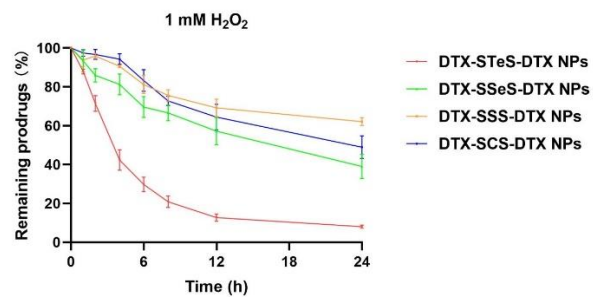

**Supplementary Figure 16.** In vitro the response rate of HPNAs under 1 mM H<sub>2</sub>O<sub>2</sub>. Data are presented as mean  $\pm$  SD (n = 3 independent experiments). Source data are provided as a Source Data file.

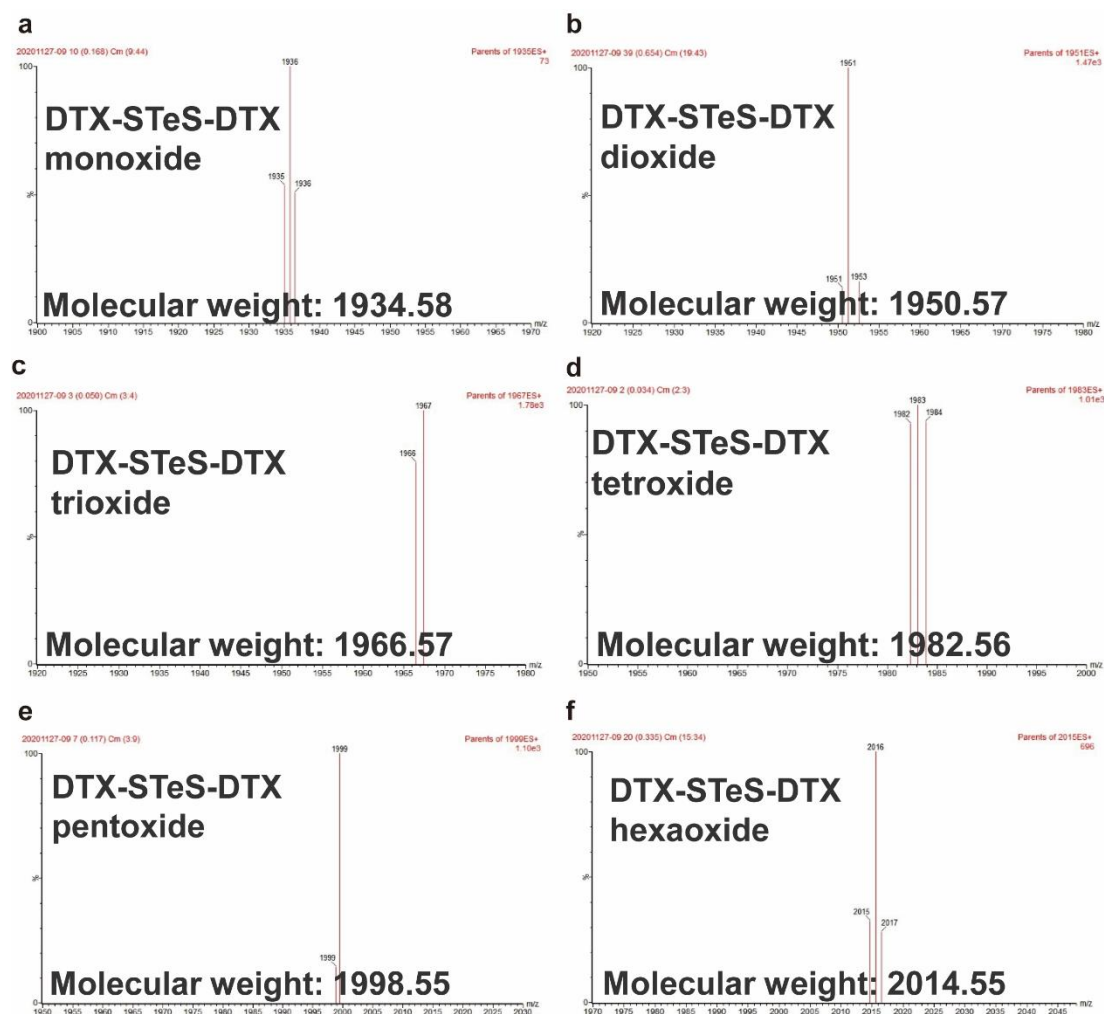

**Supplementary Figure 17.** In vitro oxidation-responsive release intermediate of DTX-STeS-DTX. **a-f** Mass spectra of mono- to hexaoxide of DTX-STeS-DTX after incubated with H<sub>2</sub>O<sub>2</sub>-containing release media.

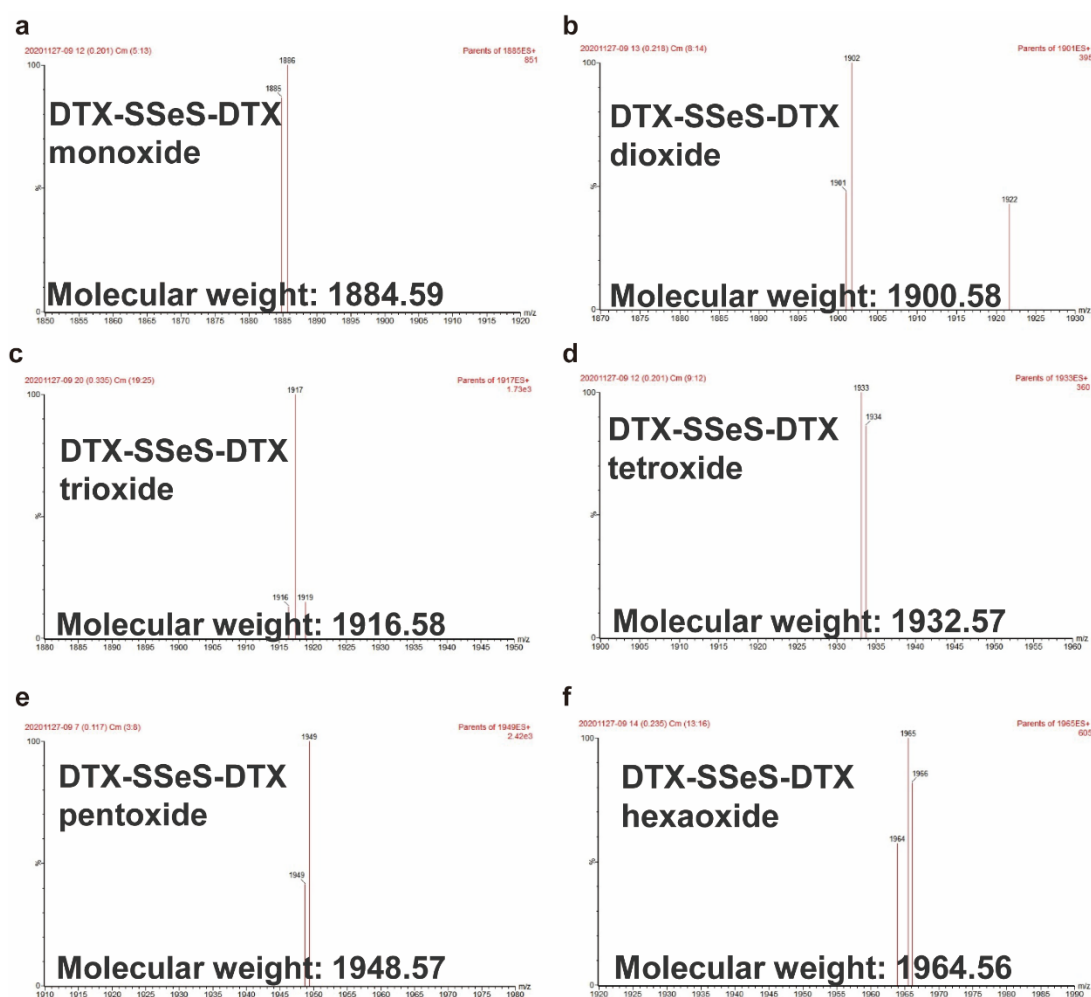

**Supplementary Figure 18.** In vitro oxidation-responsive release intermediate of DTX-SSeS-DTX. **a-f** Mass spectra of mono-to hexaoxide of DTX-SSeS-DTX after incubated with H<sub>2</sub>O<sub>2</sub>-containing release media.

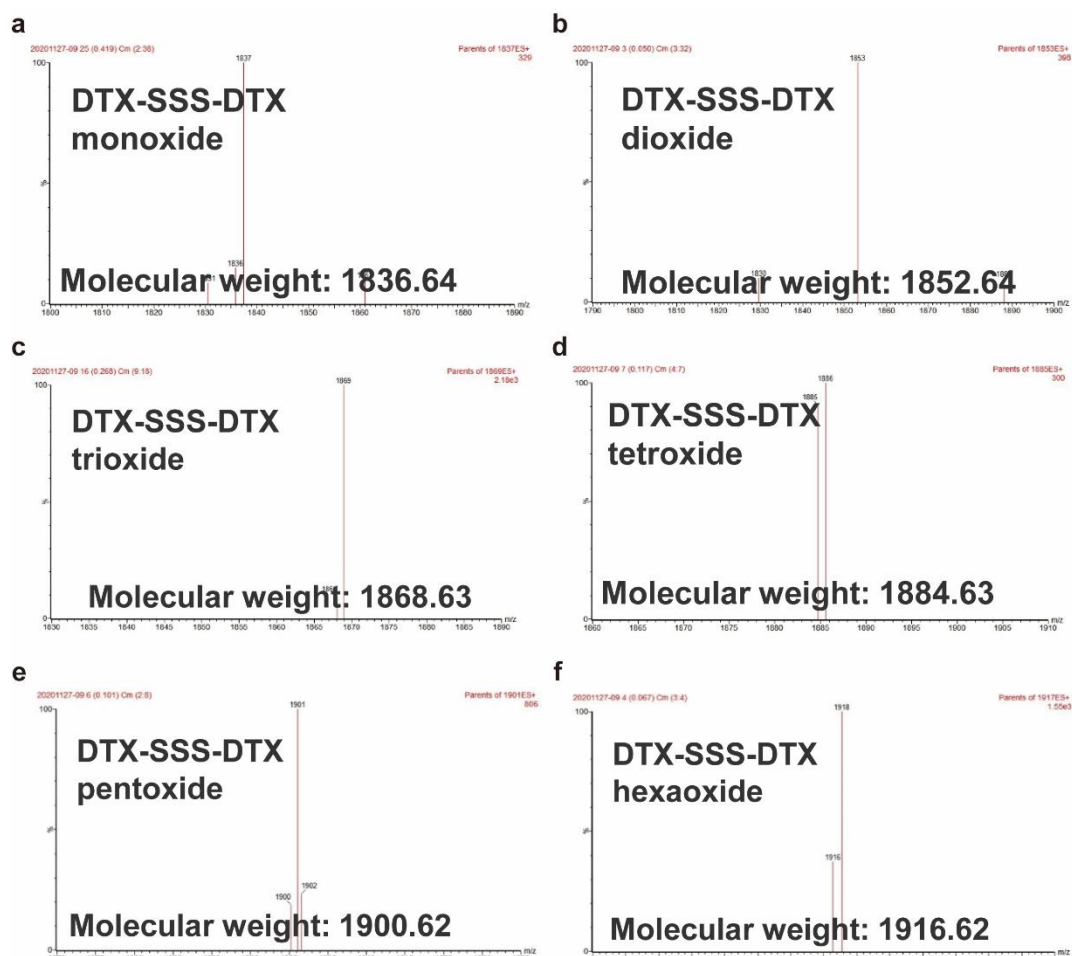

**Supplementary Figure 19.** In vitro oxidation-responsive release intermediate of DTX-SSS-DTX. **a-f** Mass spectra of mono-to hexaoxide of DTX-SSS-DTX after incubated with H<sub>2</sub>O<sub>2</sub>-containing release media.

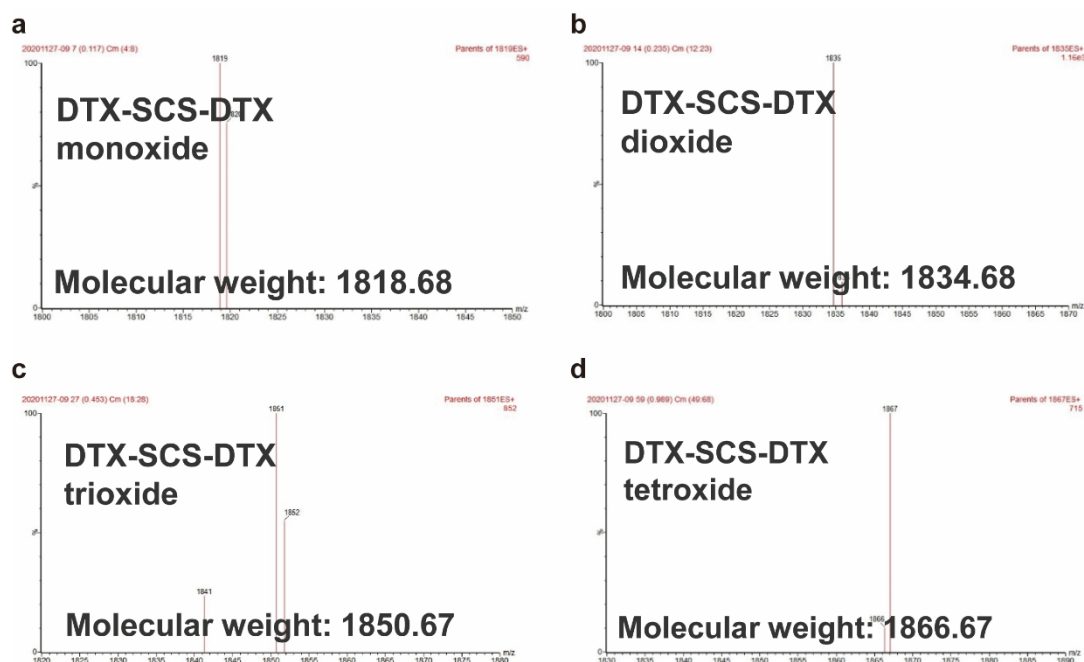

**Supplementary Figure 20.** In vitro oxidation-responsive release intermediate of DTX-SCS-DTX. **a-d** Mass spectra of mono-to tetroxide of DTX-SCS-DTX after incubated with H<sub>2</sub>O<sub>2</sub>-containing release media.

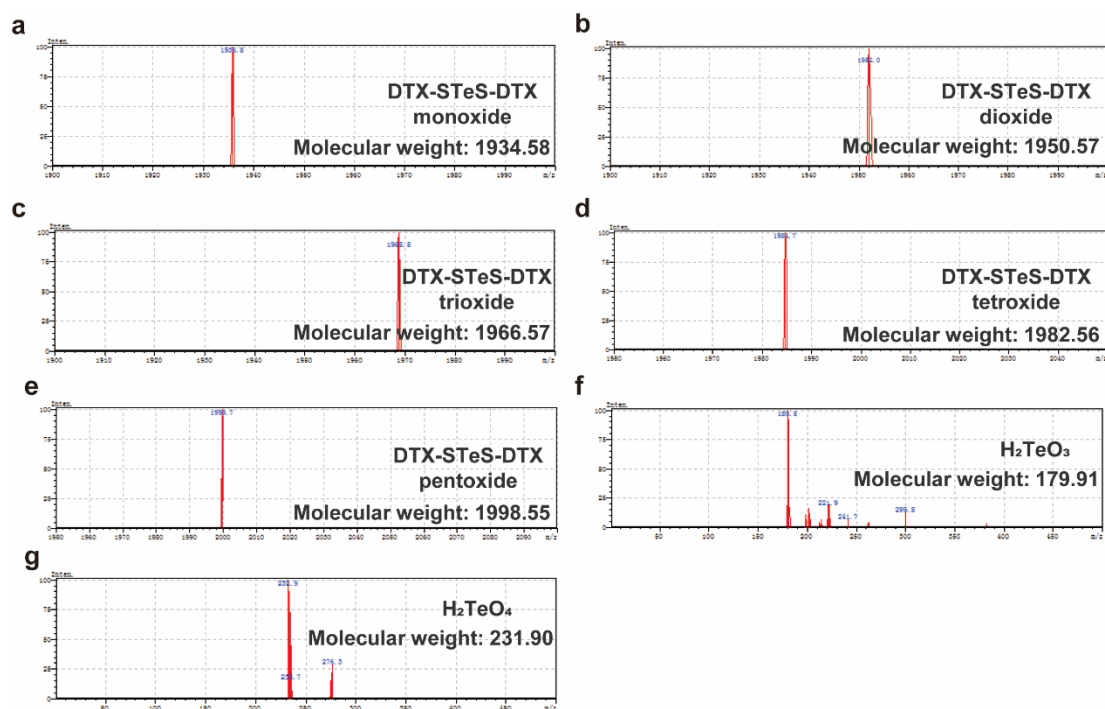

**Supplementary Figure 21.** Mass spectra of intracellular oxidation-responsive intermediates of DTX-STeS-DTX NPs. **a-e** monoxide to pentoxide of DTX-STeS-DTX. **f-g** tellurite acid and telluric acid.

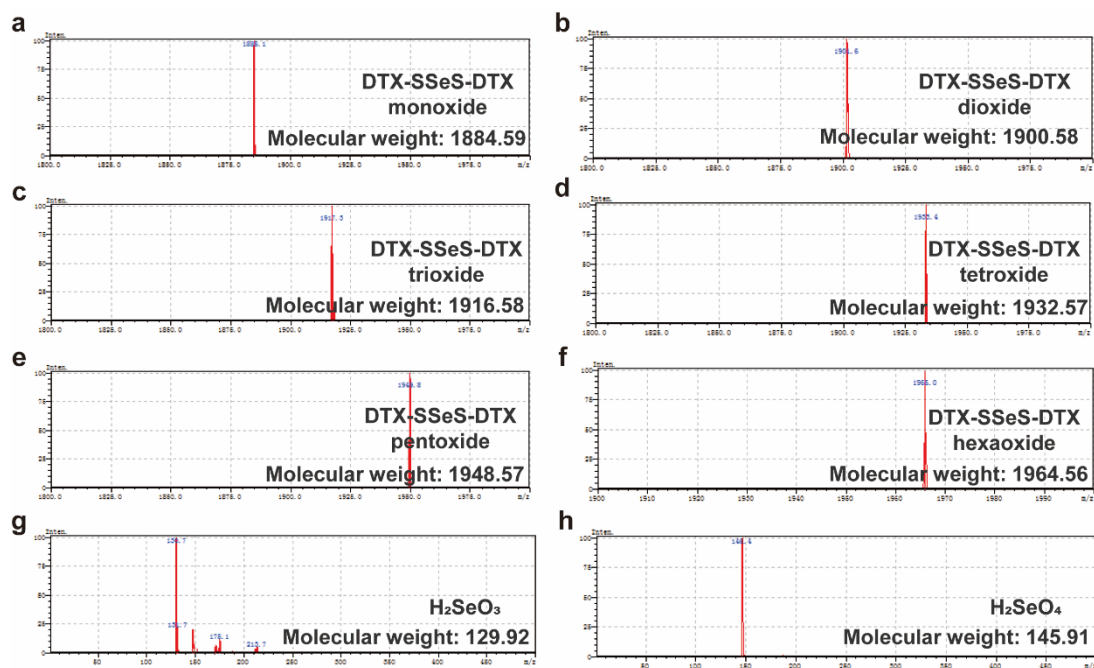

**Supplementary Figure 22.** Mass spectra of intracellular oxidation-responsive intermediates of DTX-SSeS-DTX NPs. **a-f** monoxide to hexaoxide of DTX-SSeS-DTX. **g-h** selenous acid and selenic acid.

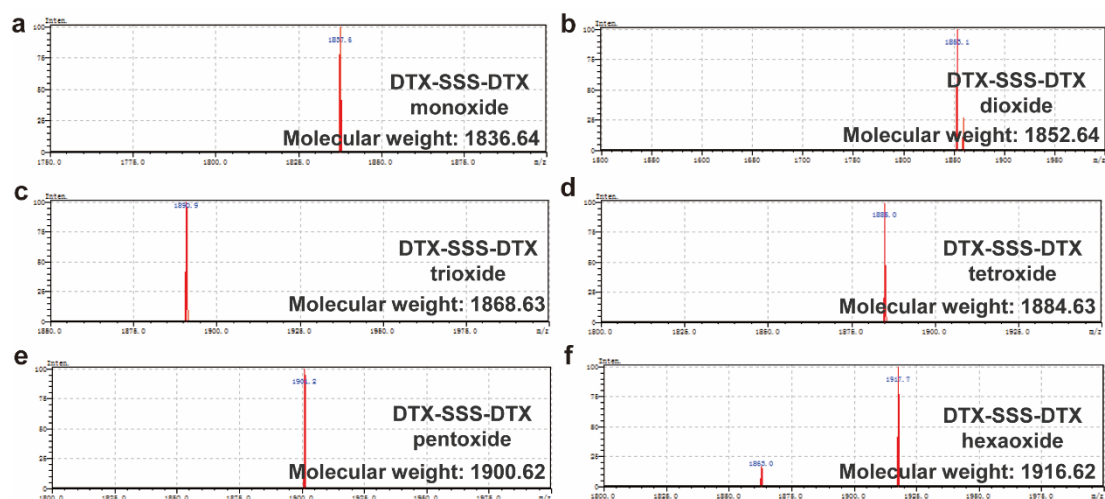

**Supplementary Figure 23.** Mass spectra of intracellular oxidation-responsive intermediates of DTX-SSS-DTX NPs. **a-f** monoxide to hexaoxide of DTX-SSS-DTX.

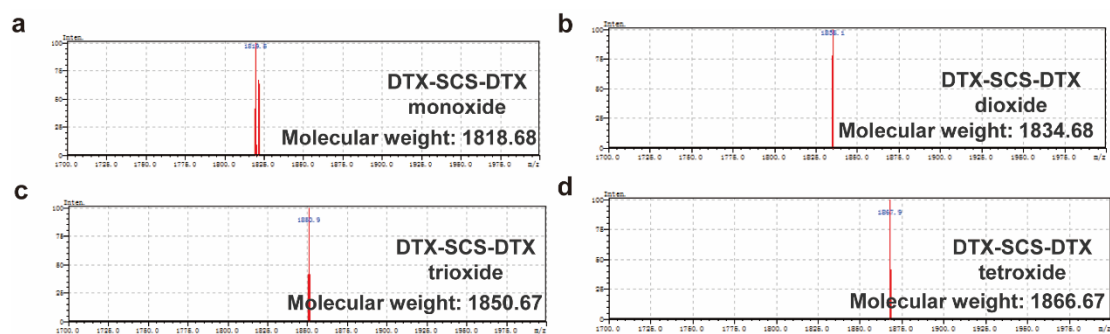

**Supplementary Figure 24.** Mass spectra of intracellular oxidation-responsive intermediates of DTX-SCS-DTX NPs. **a-d** monoxide to tetroxide of DTX-SCS-DTX.

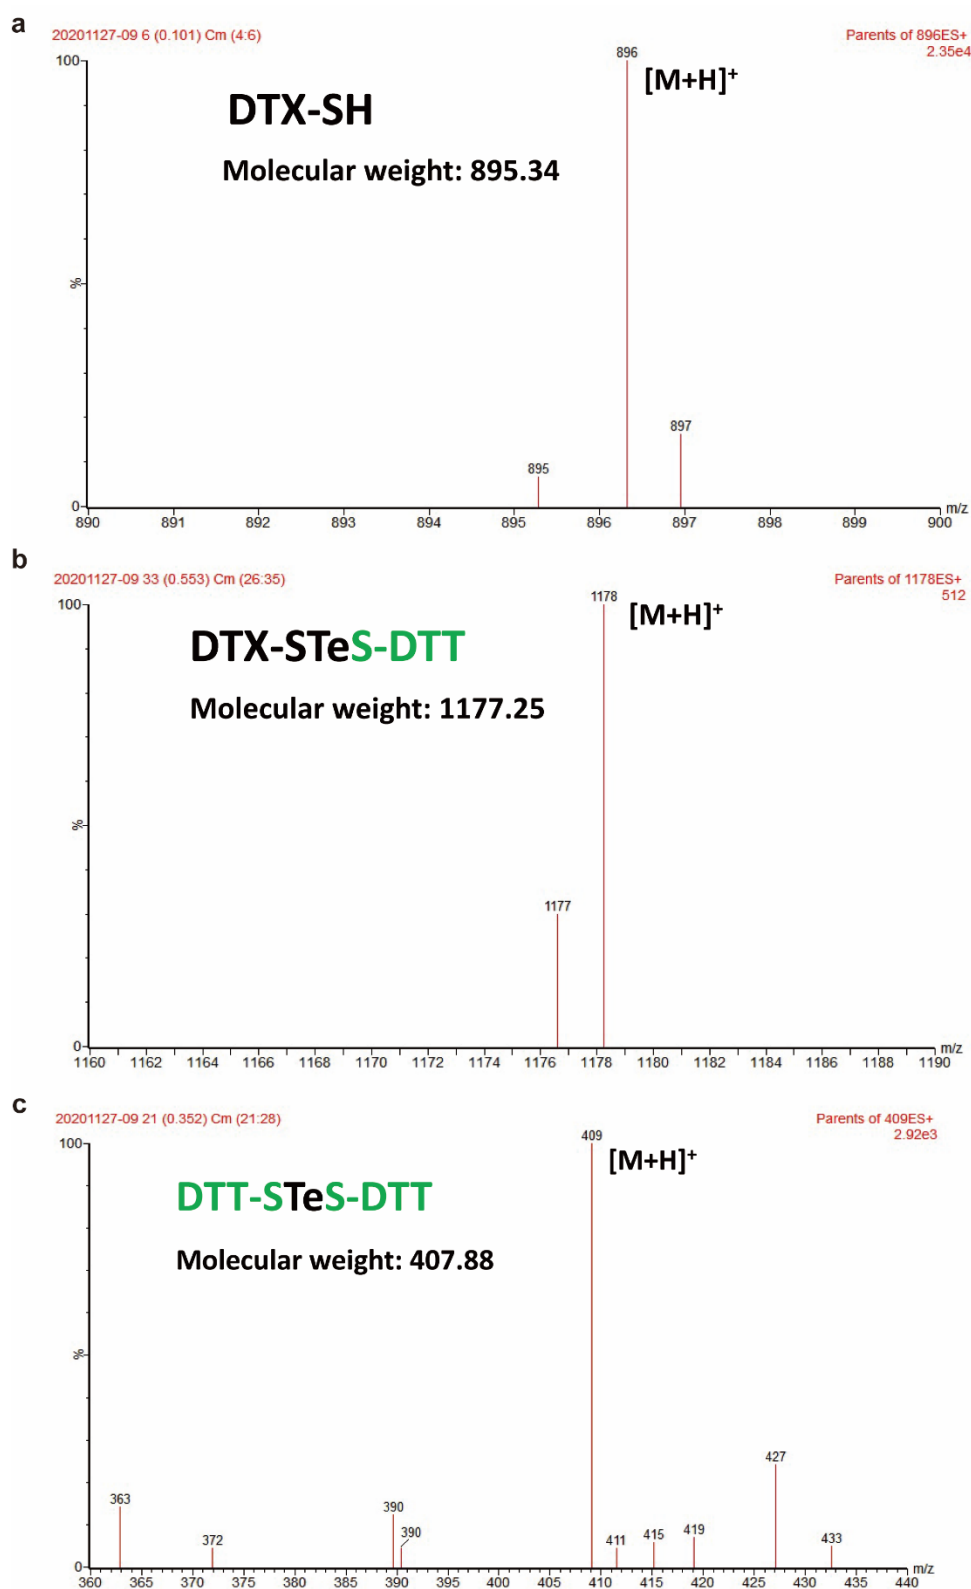

**Supplementary Figure 25.** Mass spectra of DTX-STeS-DTT after incubated with DTT containing release media. **a** DTX-SH. **b** DTX-STeS-DTT. **c** DTT-STeS-DTT.

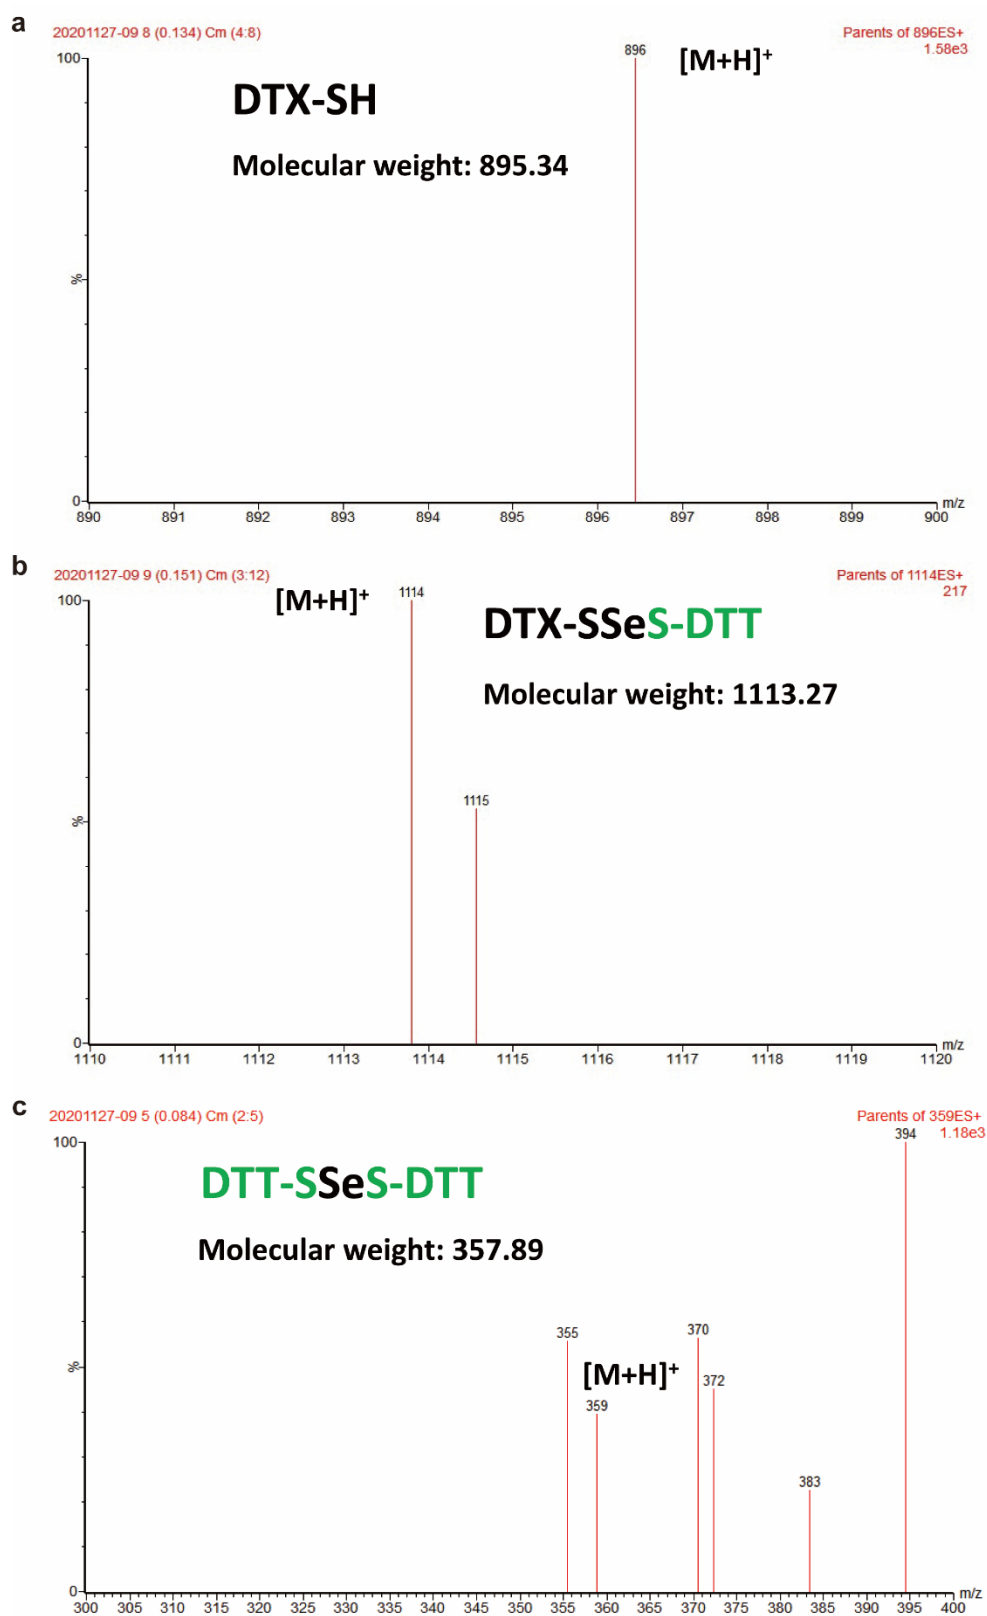

**Supplementary Figure 26.** Mass spectra of DTX-SSeS-DTX after incubated with DTT containing release media. **a** DTX-SH. **b** DTX-SSeS-DTT. **c** DTT-SSeS-DTT.

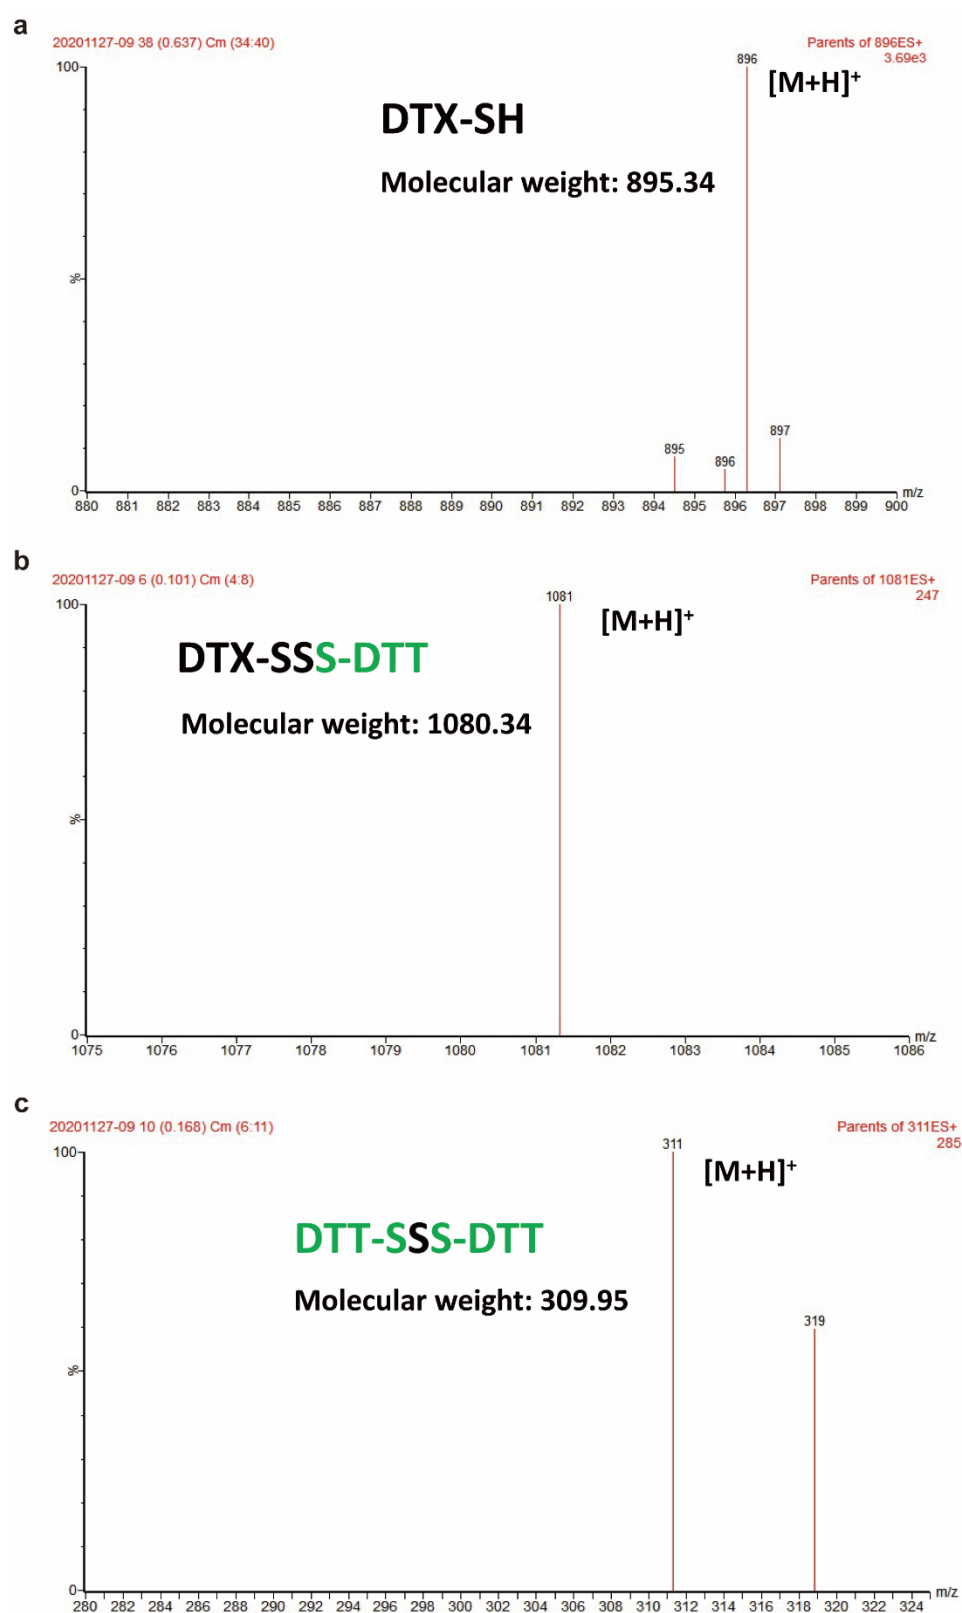

**Supplementary Figure 27.** Mass spectra of DTX-SSS-DTX after incubated with DTT containing release media. **a** DTX-SH. **b** DTX-SSS-DTT. **c** DTT-SSS-DTT.

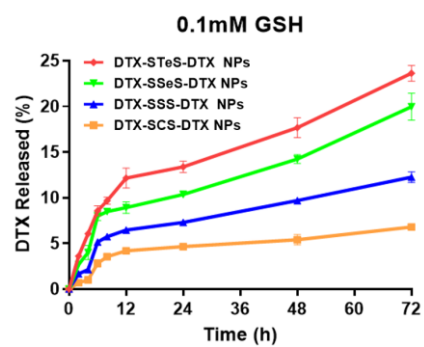

**Supplementary Figure 28.** In vitro reduction-responsive drug release of HPNAs in the presence of 0.1 mM GSH. Data are presented as mean  $\pm$  SD (n = 3 independent experiments). Source data are provided as a Source Data file.

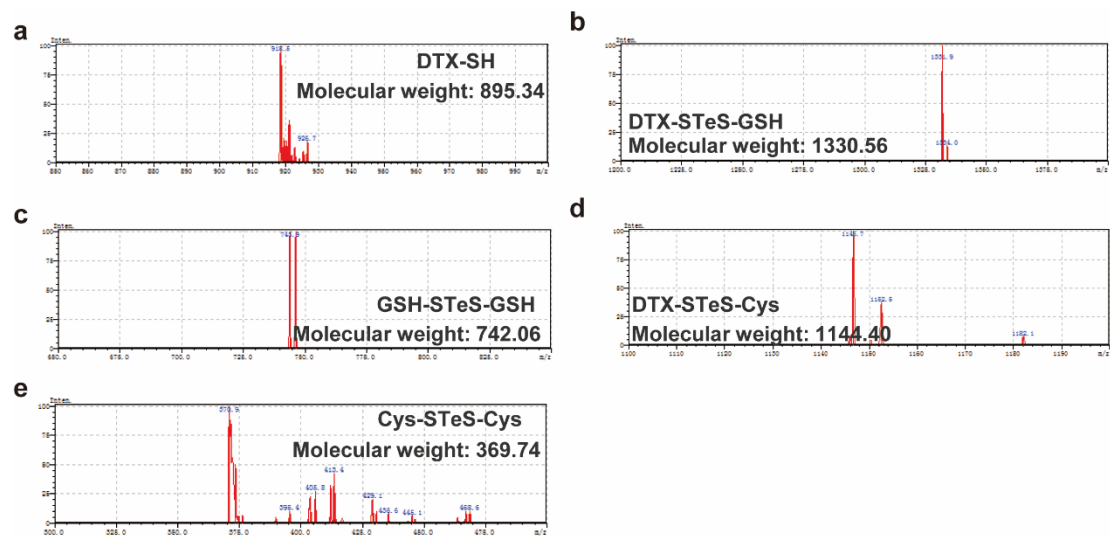

**Supplementary Figure 29.** Mass spectra of intracellular reduction-responsive intermediates of DTX-STeS-DTX NPs. **a** DTX-SH. **b** DTX-STeS-GSH. **c** GSH-STeS-GSH. **d** DTX-STeS-Cys. **e** Cys-STeS-Cys.

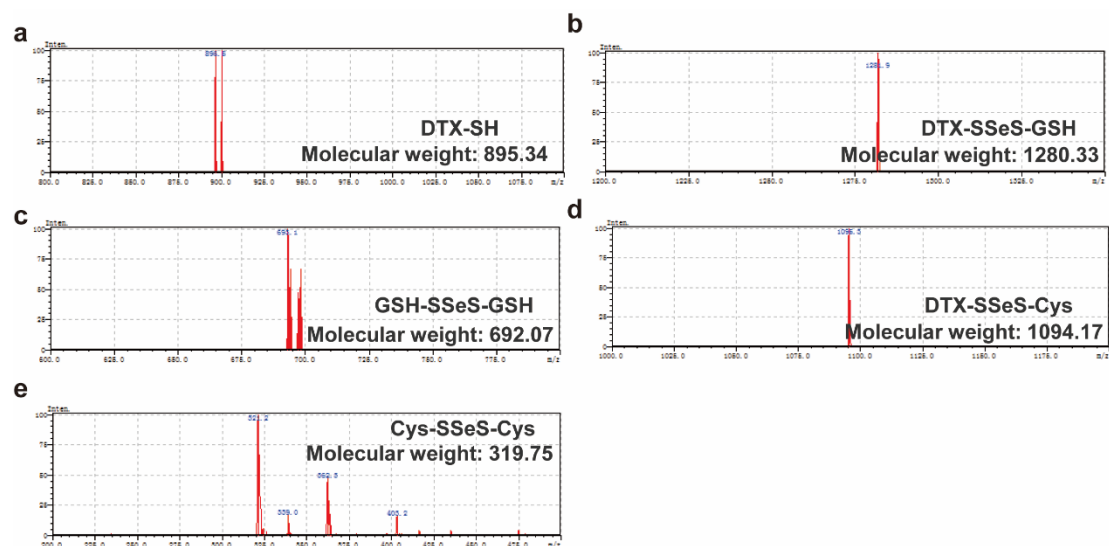

**Supplementary Figure 30.** Mass spectra of intracellular reduction-responsive intermediates of DTX-SSeS-DTX NPs. **a** DTX-SH. **b** DTX-SSeS-GSH. **c** GSH-SSeS-GSH. **d** DTX-SSeS- Cys. **e** Cys-SSeS-Cys.

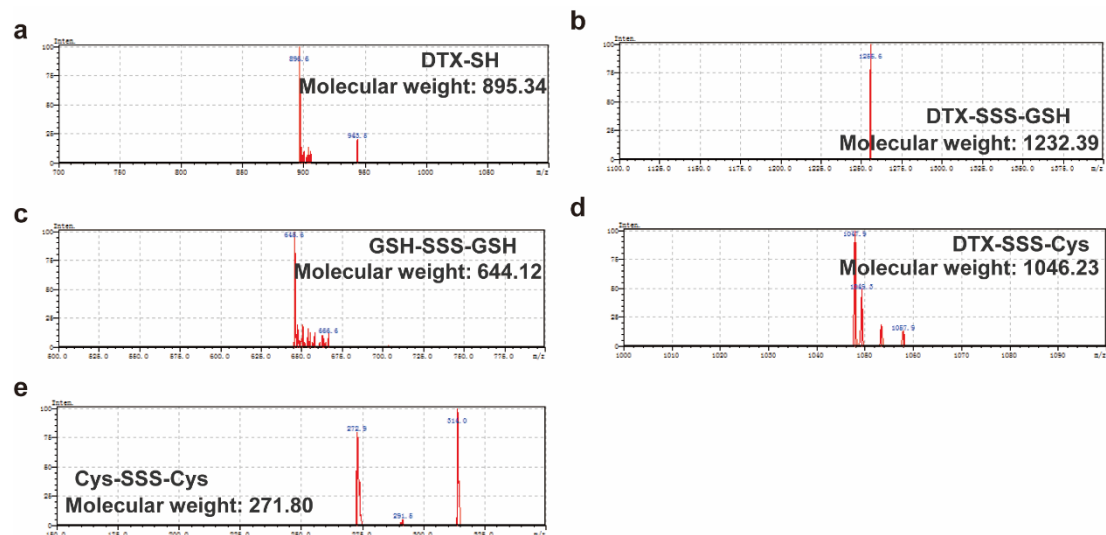

**Supplementary Figure 31.** Mass spectra of intracellular reduction-responsive intermediates of DTX-SSS-DTX NPs. **a** DTX-SH. **b** DTX-SSS-GSH. **c** GSH-SSS-GSH. **d** DTX-SSS-Cys. **e** Cys-SSS-Cys.

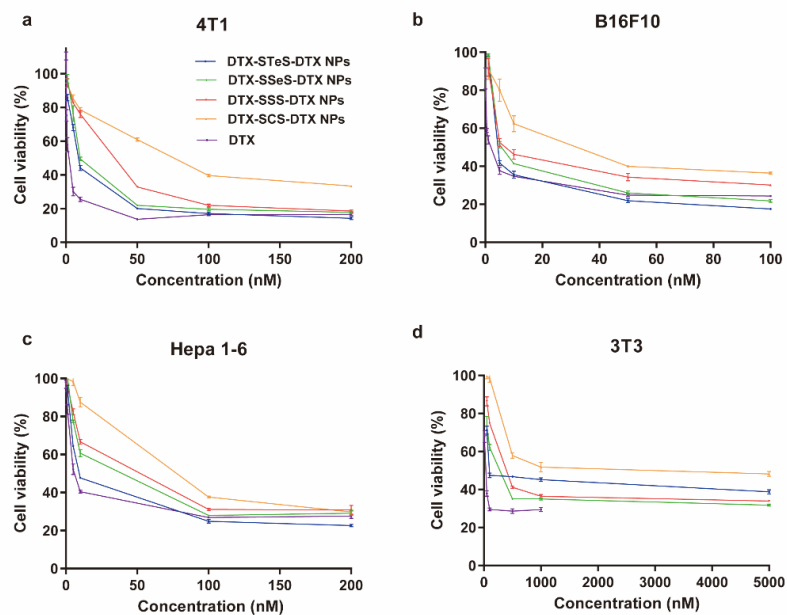

**Supplementary Figure 32.** Cell viability treated with various concentrations of Taxol and HPNAs. **a** 4T1 cells, **b** B16F10 cells, **c** Hepa 1-6 cells, and **d** 3T3 cells. All Data are presented as mean  $\pm$  SD ( $n = 3$  independent experiments). Source data are provided as a Source Data file.

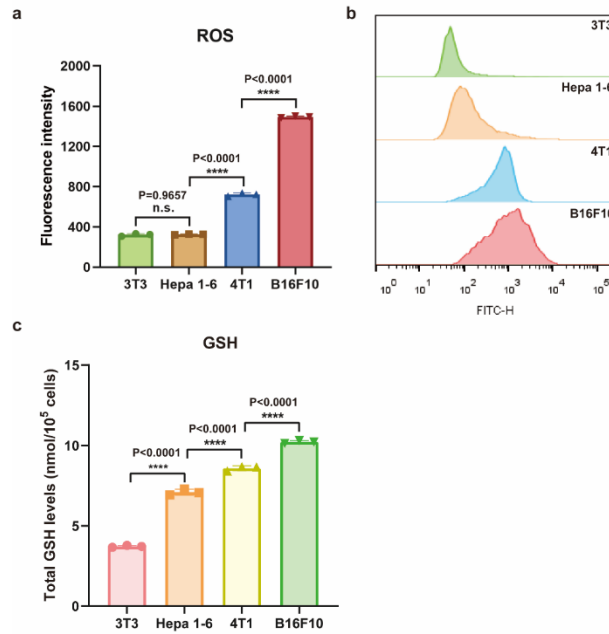

**Supplementary Figure 33.** Intracellular ROS and GSH levels of the 3T3, Hepa 1-6, 4T1, and B16F10 cells. **a** Flow cytometry analysis for intracellular ROS of the different cells. Data are presented as mean  $\pm$  SD ( $n = 3$  independent experiments). One-way ANOVA with Tukey's multiple comparisons test was used for the analysis of data and adjusted P value. It was one-sided. Source data are provided as a Source Data file. **b** Histogram of flow analysis for intracellular ROS. **c** Intracellular GSH concentrations of the 3T3, Hepa 1-6, 4T1, and B16F10 cells. Data are presented as mean  $\pm$  SD ( $n = 3$  independent experiments). One-way ANOVA with Tukey's multiple comparisons test was used for the analysis of data and adjusted P value. It was one-sided. Source data are provided as a Source Data file.

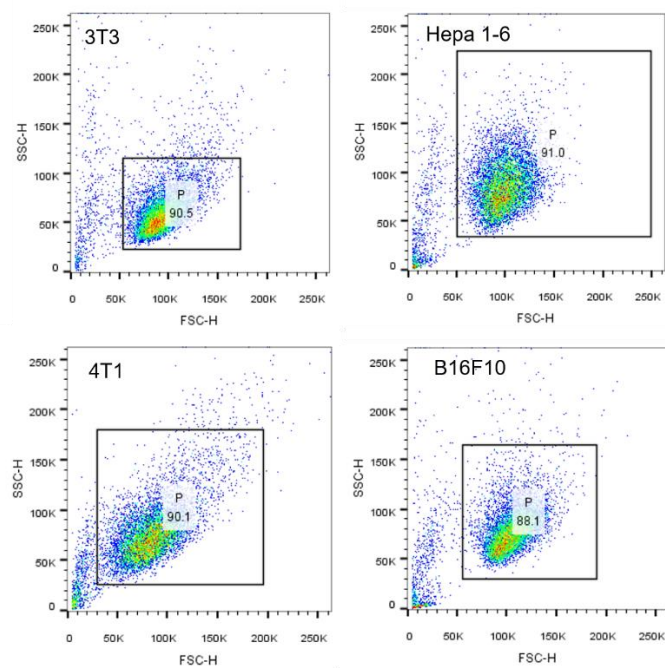

**Supplementary Figure 34.** The gating strategy for intracellular ROS levels of the 3T3, Hepa 1-6, 4T1, and B16F10 cells.

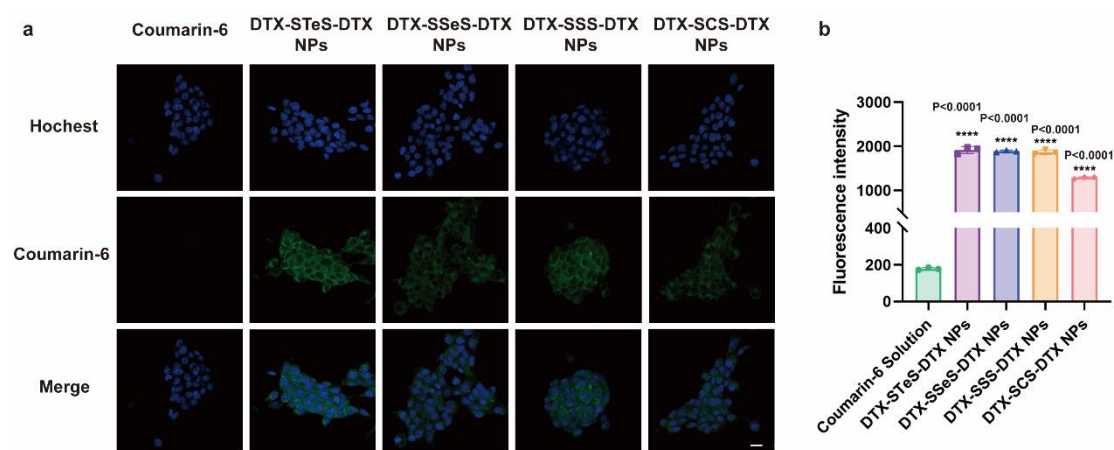

**Supplementary Figure 35.** Cellular uptake of HPNAs at 0.5 h. **a** Cellular uptake of free coumarin-6 or coumarin-6-labeled HPNAs at 0.5 h. Scale bar represents 10  $\mu$ m. Experiment was repeated twice independently with similar results. **b** Results of cell uptake by flow cytometry. Data are presented as mean  $\pm$  SD (n = 3 independent experiments). One-way ANOVA (one-sided) with Dunnett's multiple comparisons test was used for the analysis of data and adjusted P value. Source data are provided as a Source Data file.

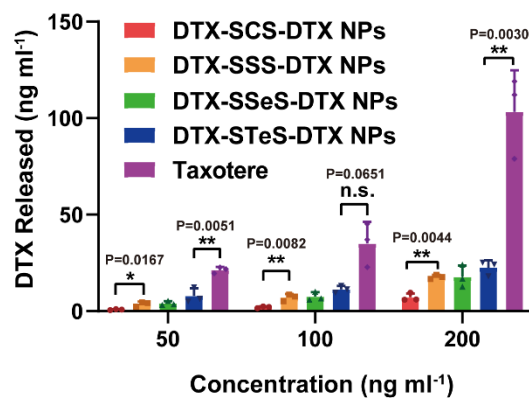

**Supplementary Figure 36.** Free DTX released from HPNAs after incubation with 4T1 cells for 48 h. Data are presented as mean  $\pm$  SD ( $n = 3$  independent experiments). n.s (no significance)  $P > 0.05$ , \*  $P < 0.05$  and \*\*  $P < 0.01$  by two-tailed Student's t-test. Source data are provided as a Source Data file.

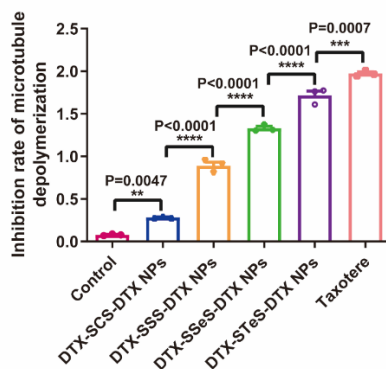

**Supplementary Figure 37.** The fluorescence intensity of inhibition rate of microtubule depolymerization in CLSM images analyzed by Image J. Data are presented as mean  $\pm$  SD (n = 3 independent experiments). One-way ANOVA with Tukey's multiple comparisons test was used for the analysis of data and adjusted P value. It was one-sided. \*\* P < 0.01, \*\*\*P < 0.001 and \*\*\*\*P < 0.0001. Source data are provided as a Source Data file.

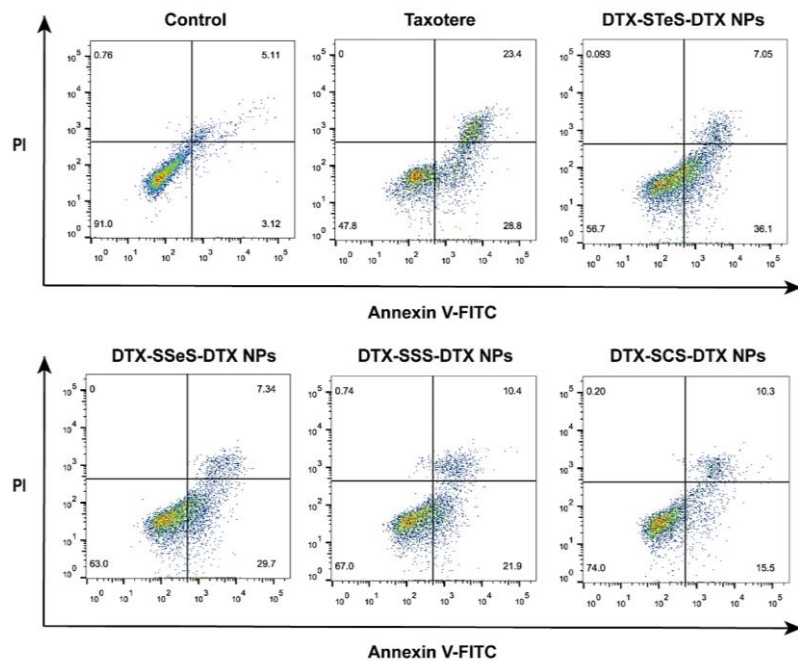

**Supplementary Figure 38.** Cellular apoptosis assay of Taxotere and HPNAs in 4T1 cells.

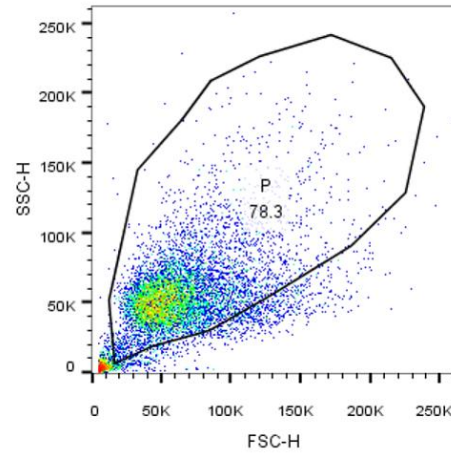

**Supplementary Figure 39.** The gating strategy for cellular apoptosis assay in 4T1 cells.

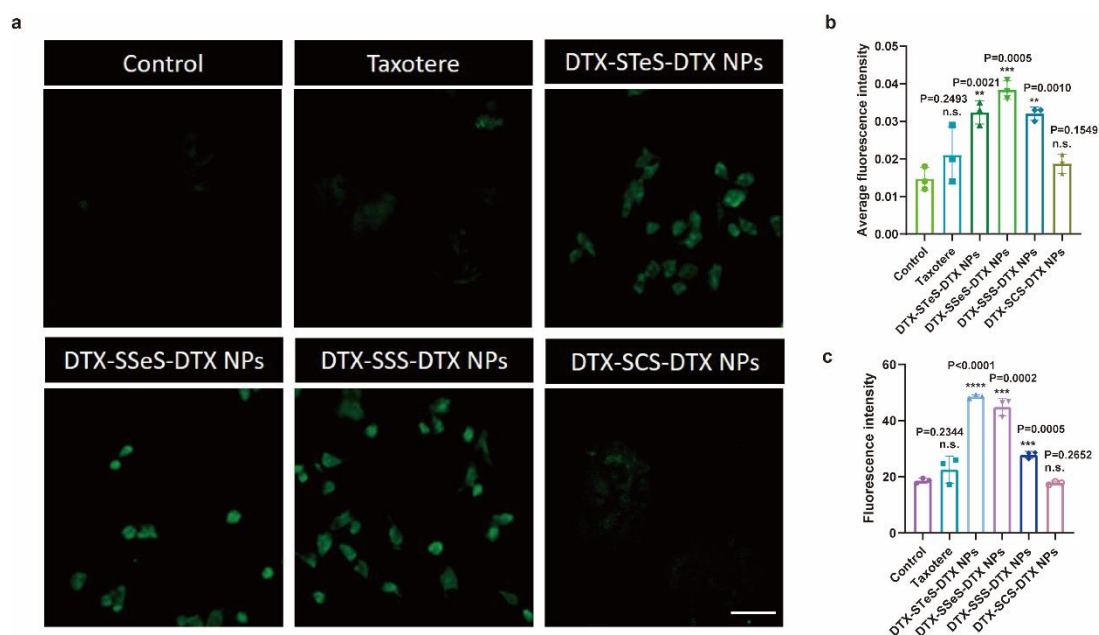

**Supplementary Figure 40.** Intracellular ROS levels of the 4T1 after treated with Taxotere or HPNAs. **a** CLSM images. Scale bar represents 20  $\mu$ m. Experiment was repeated twice independently with similar results. **b** Fluorescence quantitative results of CLSM images. Data are presented as mean  $\pm$  SD ( $n = 3$  independent experiments). Source data are provided as a Source Data file. **c** Flow cytometry analysis for intracellular ROS. Data are presented as mean  $\pm$  SD ( $n = 3$  independent experiments). n.s (no significance)  $P > 0.05$ , \*\*  $P < 0.01$ , \*\*\*  $P < 0.001$ , and \*\*\*\*  $P < 0.0001$  by two-tailed Student's  $t$  test. Source data are provided as a Source Data file.

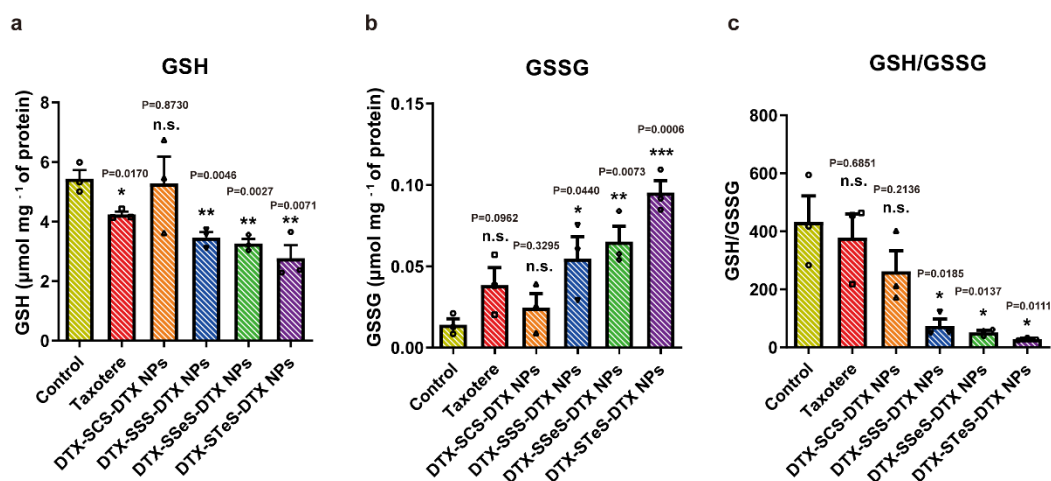

**Supplementary Figure 41.** Flow cytometric analysis for intracellular GSH/GSSG levels of the 4T1 after treated with Taxotere or HPNAs. **a** The concentration of GSH. **b** The concentration of GSSG. **c** The concentration ratio of GSH and GSSG. All data are presented as mean  $\pm$  SD ( $n = 3$  independent experiments). n.s (no significance)  $P > 0.05$ , \*  $P < 0.05$ , \*\*  $P < 0.01$ , and \*\*\*  $P < 0.001$  by two-tailed Student's  $t$  test. Source data are provided as a Source Data file.

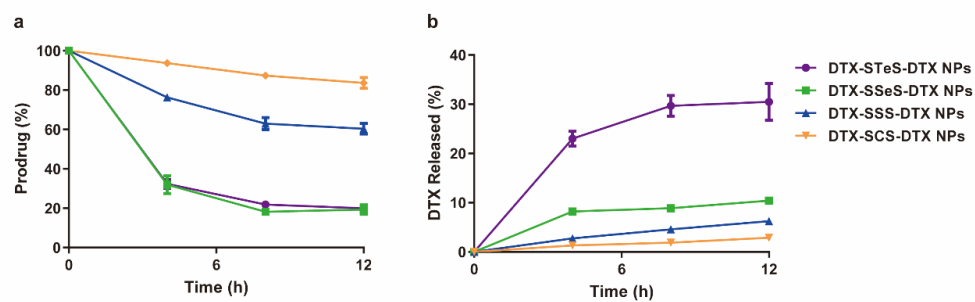

**Supplementary Figure 42.** The chemical stability of HPNAs in the fresh rat plasma. **a** Degradation of prodrugs. **b** The released DTX from HPNAs. Data are presented as mean  $\pm$  SD ( $n = 3$  independent experiments). Source data are provided as a Source Data file.

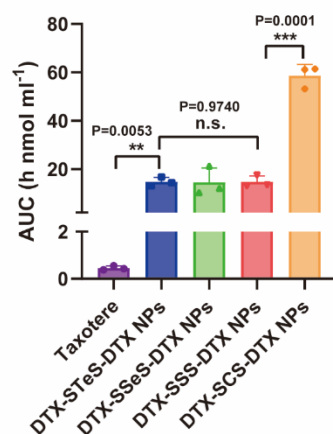

**Supplementary Figure 43.** Area under curve (AUC) of Taxotere and HPNAs. Data are presented as mean  $\pm$  SD (n = 3 rats). n.s (no significance)  $P > 0.05$ , \*\*  $P < 0.01$  and \*\*\* $P < 0.001$  by two-tailed Student's t-test. Source data are provided as a Source Data file.

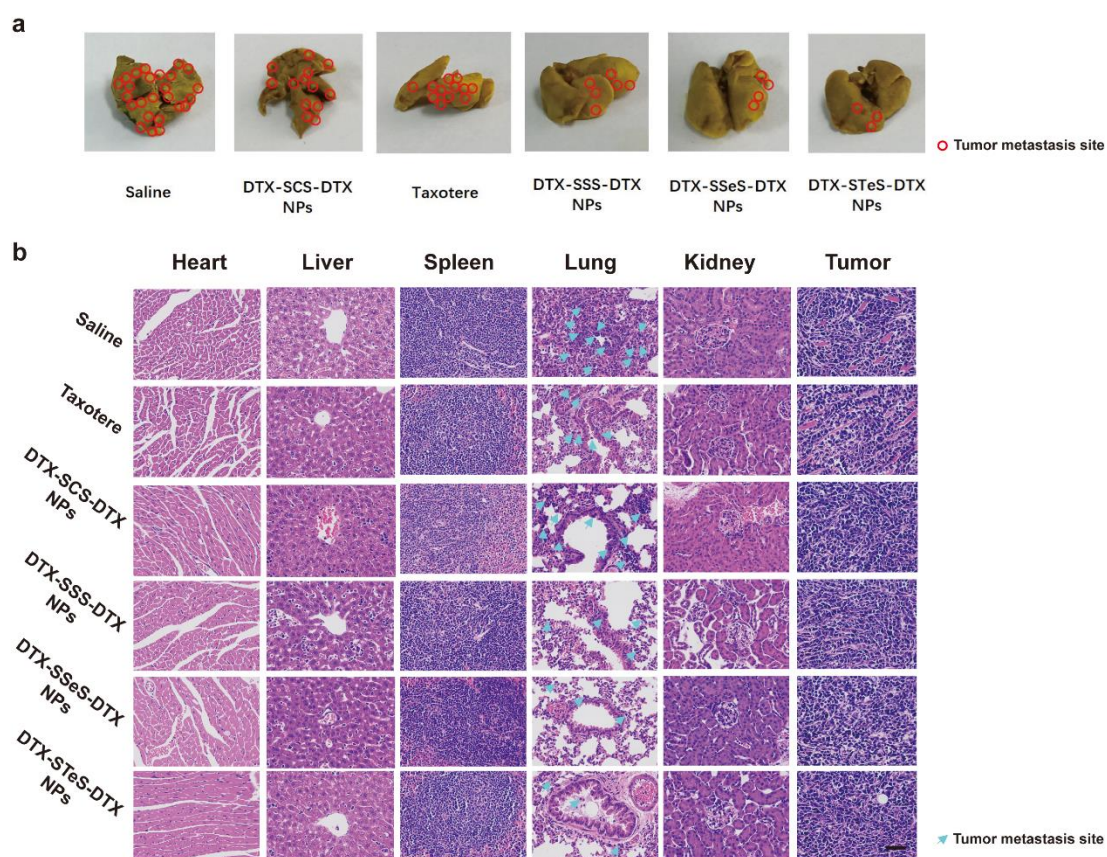

**Supplementary Figure 44.** Lung metastasis and H&E staining at doses of  $2 \text{ mg kg}^{-1}$ . **a** Lung metastasis of 4T1 tumor-bearing BALB/c mice after treatments. The red circles represent the location of tumor metastasis. **b** H&E staining. The major organs and tumor sections of 4T1 tumor-bearing BALB/c mice were prepared after the last treatments. The blue arrows represent the location of tumor metastasis. Scale bar represents  $100 \mu\text{m}$ . Experiment was repeated three times independently with similar results.

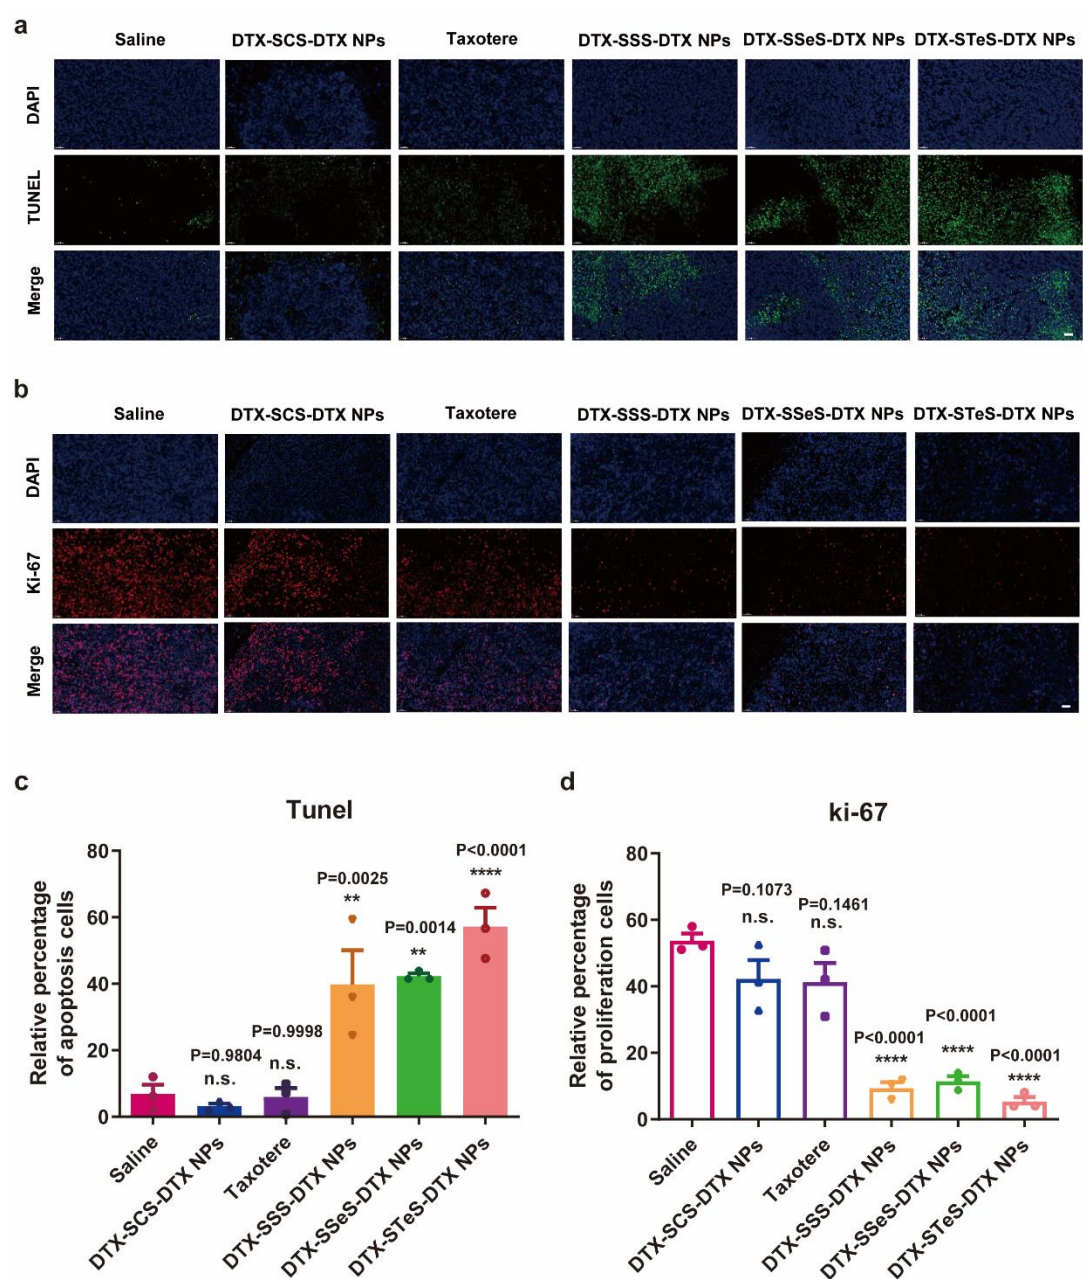

**Supplementary Figure 45.** TUNEL and Ki67 assay of 4T1 tumor sections at doses of 2 mg kg<sup>-1</sup> after the last treatment. **a-b** Fluorescence microscope image. Scale bar represents 50  $\mu$ m. **c-d** Fluorescence quantitative results of TUNEL and Ki67 assay. Data are presented as mean  $\pm$  SD (n = 3 mice). One-way ANOVA with Dunnett's multiple comparisons test was used for the analysis of data and adjusted P value. It was one-sided. Source data are provided as a Source Data file.

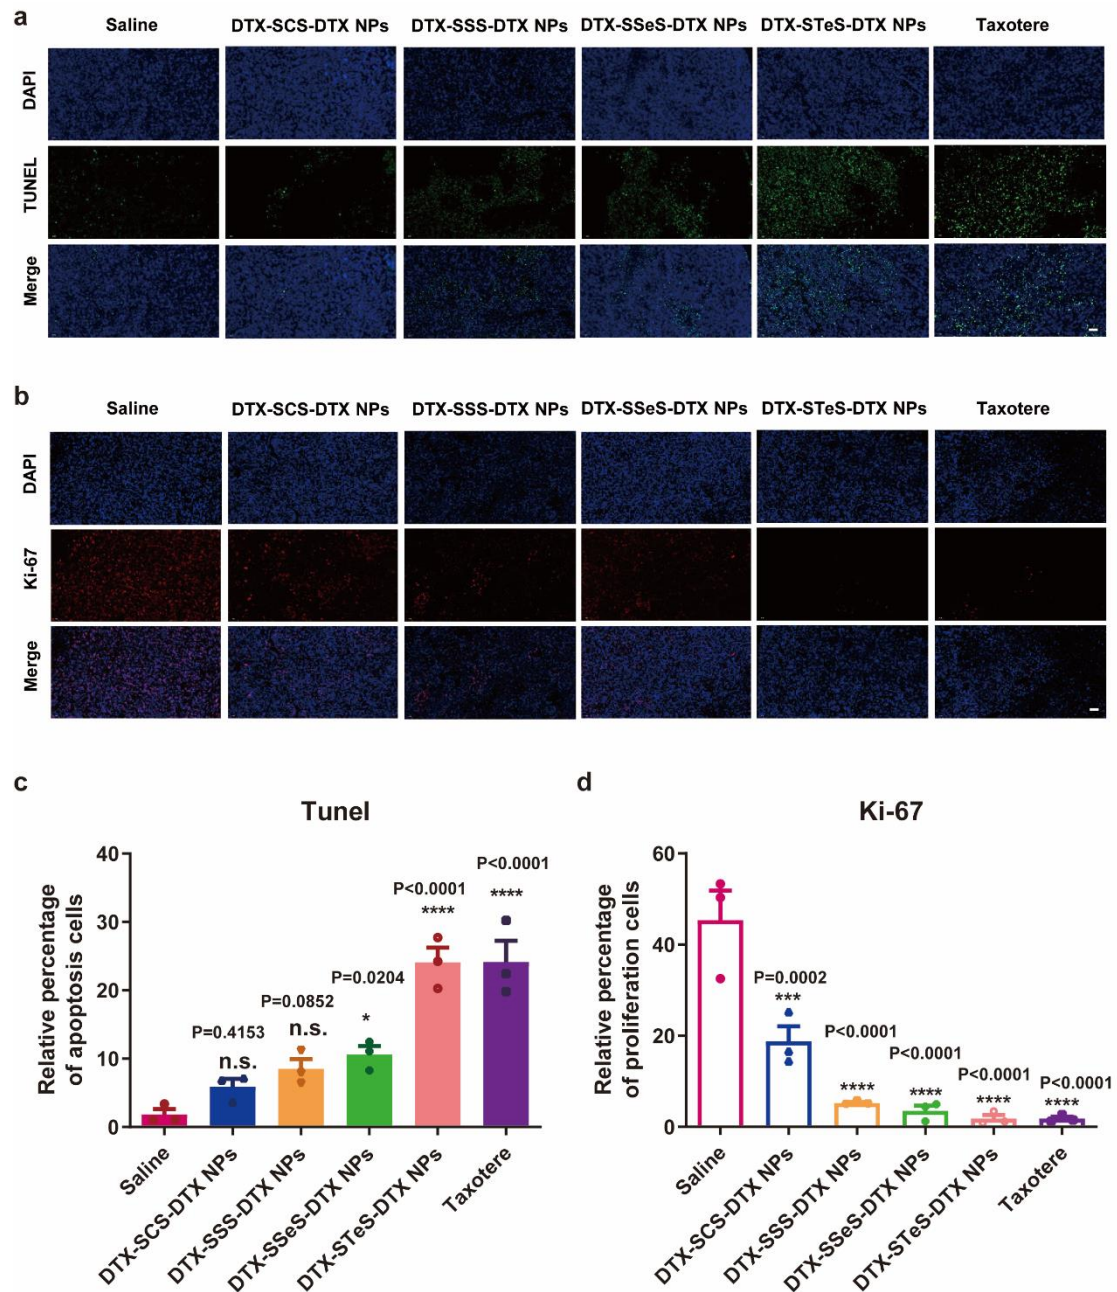

**Supplementary Figure 46.** TUNEL and Ki67 assay of 4T1 tumor sections at doses of 10 mg kg<sup>-1</sup> after the last treatment. **a-b** Fluorescence microscope image. Scale bar represents 50  $\mu$ m. **c-d** Fluorescence quantitative results of TUNEL and Ki67 assay. Data are presented as mean  $\pm$  SD (n = 3 mice). One-way ANOVA with Dunnett's multiple comparisons test was used for the analysis of data and adjusted P value. It was one-sided. Source data are provided as a Source Data file.

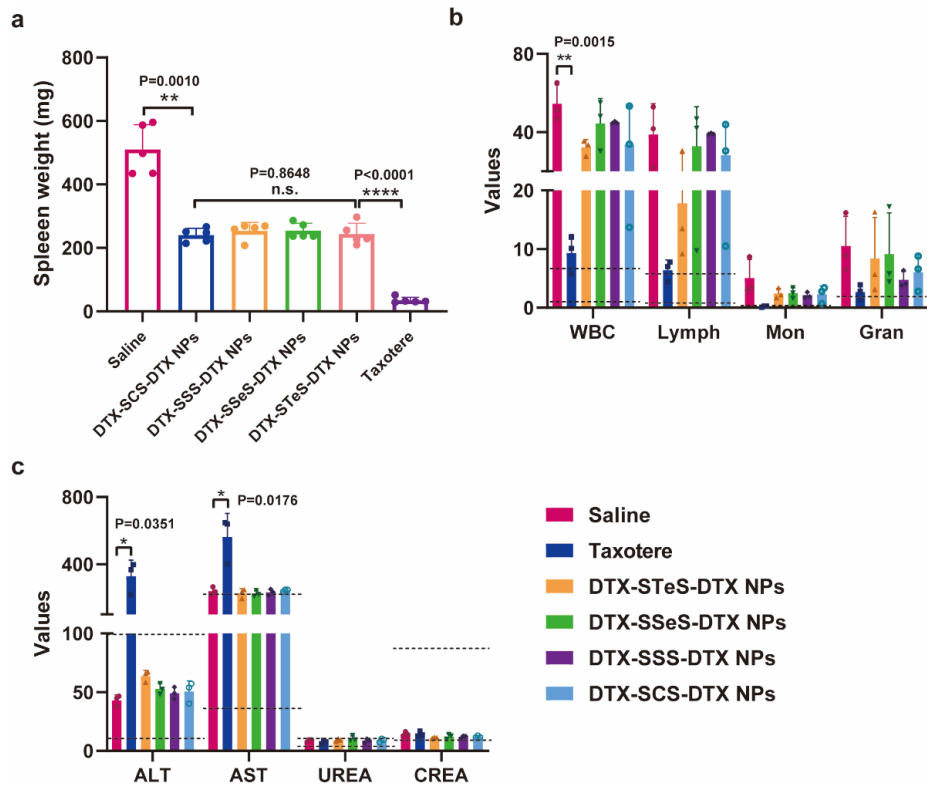

**Supplementary Figure 47.** Safety analysis of HPNAs at a dose of 10 mg kg<sup>-1</sup>. **a** Spleen weight of 4T1 tumor-bearing BALB/c mice after treatments. Data are presented as mean  $\pm$  SD (n = 5 mice). Source data are provided as a Source Data file. **b** Blood count. WBC: white blood cell count (10<sup>9</sup> L<sup>-1</sup>), Lymph: lymphocyte count (10<sup>9</sup> L<sup>-1</sup>), Mon: monocyte count (10<sup>9</sup> L<sup>-1</sup>), Gran: granulocyte count (10<sup>9</sup> L<sup>-1</sup>). Data are presented as mean  $\pm$  SD (n = 3 mice). Source data are provided as a Source Data file. **c** Hepatorenal function parameters. AST: aspartate aminotransferase (U L<sup>-1</sup>); ALT: alanine aminotransferase (U L<sup>-1</sup>), BUN: blood urea nitrogen (mmol L<sup>-1</sup>), CREA: creatinine ( $\mu$ mol L<sup>-1</sup>). The dotted line represents the reference value of normal mice. Data are presented as mean  $\pm$  SD (n = 3 mice). n.s (no significance) P > 0.05, \* P < 0.05, \*\* P < 0.01, \*\*\* P < 0.001, and \*\*\*\* P < 0.0001 by two-tailed Student's t test. Source data are provided as a Source Data file.

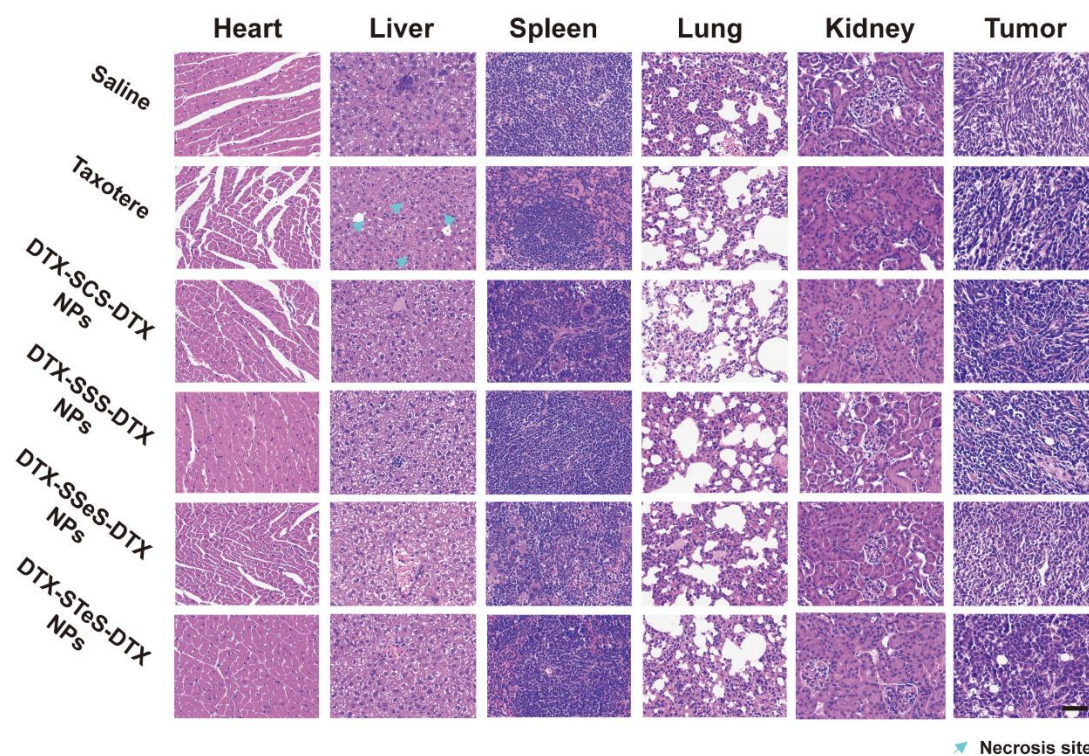

**Supplementary Figure 48.** H&E staining at doses of  $10 \text{ mg kg}^{-1}$ . The major organs and tumor sections of 4T1 tumor-bearing BALB/c mice were prepared after the last treatments. The blue arrows represent the location of necrotic site. Scale bar represents  $100 \mu\text{m}$ . Experiment was repeated three times independently with similar results.

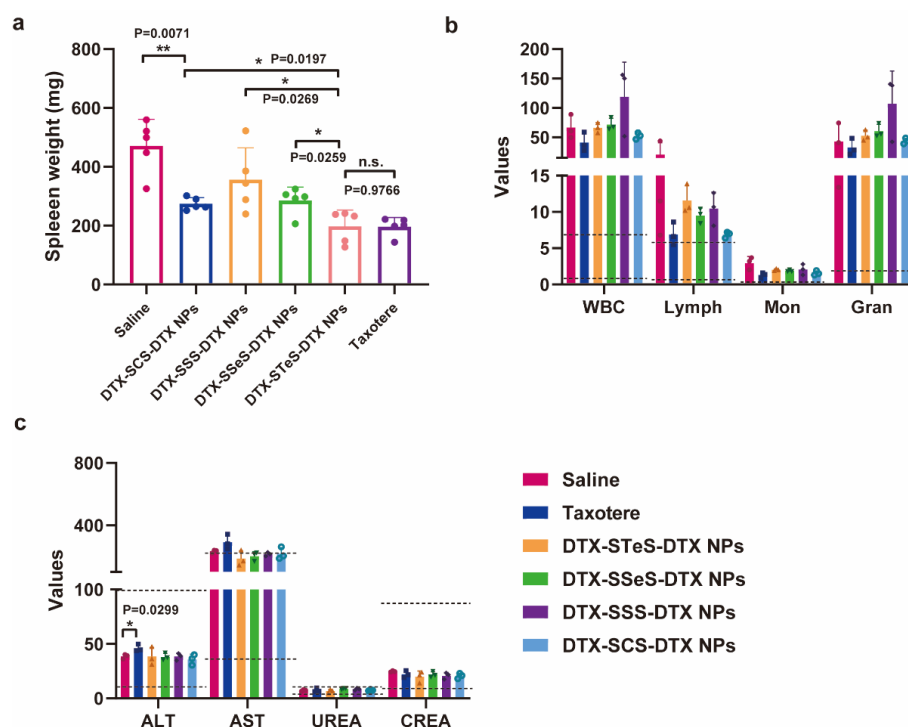

**Supplementary Figure 49.** Safety analysis of HPNAs at a dose of  $2 \text{ mg kg}^{-1}$ . **a** Spleen weight. Data are presented as mean  $\pm$  SD ( $n = 5$  mice). Source data are provided as a Source Data file. **b** Blood count. WBC: white blood cell count ( $10^9 \text{ L}^{-1}$ ), Lymph: lymphocyte count ( $10^9 \text{ L}^{-1}$ ), Mon: monocyte count ( $10^9 \text{ L}^{-1}$ ), Gran: granulocyte count ( $10^9 \text{ L}^{-1}$ ). Data are presented as mean  $\pm$  SD ( $n = 3$  mice). Source data are provided as a Source Data file. **c** Hepatorenal function parameters. AST: aspartate aminotransferase ( $\text{U L}^{-1}$ ); ALT: alanine aminotransferase ( $\text{U L}^{-1}$ ), BUN: blood urea nitrogen ( $\text{mmol L}^{-1}$ ), CREA: creatinine ( $\mu\text{mol L}^{-1}$ ). The dotted line represents the reference value of normal mice. Data are presented as mean  $\pm$  SD ( $n = 3$  mice). n.s (no significance)  $P > 0.05$ , \*  $P < 0.05$ , \*\*  $P < 0.01$ , \*\*\*  $P < 0.001$ , and \*\*\*\*  $P < 0.0001$  by two-tailed Student's  $t$  test. Source data are provided as a Source Data file.

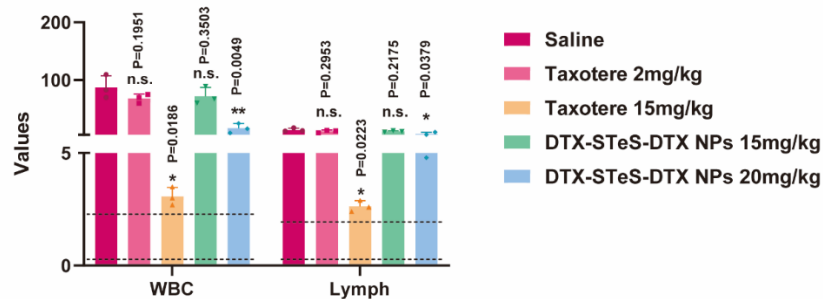

**Supplementary Figure 50.** Blood count of 4T1 tumor-bearing BALB/c mice treated with HPNAs at the high doses. WBC: white blood cell count ( $10^9 \text{ L}^{-1}$ ), Lymph: lymphocyte count ( $10^9 \text{ L}^{-1}$ ). The dotted line represents the reference value of normal mice. Data are presented as mean  $\pm$  SD ( $n = 3$  mice). n.s (no significance)  $P > 0.05$ , \*  $P < 0.05$  and \*\*  $P < 0.01$  by two-tailed Student's t test. Source data are provided as a Source Data file.

## Supplementary Tables

**Supplementary Table 1.** Characterization of PEGylated HPNAs.

| Nanoassemblies   | Size (nm) | PDI  | Zeta (mV) | DL (w/w, %) |
|------------------|-----------|------|-----------|-------------|
| DTX-STeS-DTX NPs | 96        | 0.15 | -24.3     | 67.38       |
| DTX-SSeS-DTX NPs | 95        | 0.19 | -21.0     | 69.18       |
| DTX-SSS-DTX NPs  | 97        | 0.14 | -19.8     | 71.00       |
| DTX-SCS-DTX NPs  | 109       | 0.12 | -20.3     | 71.70       |

**Supplementary Table 2.** Total binding energy of prodrug and DSPE-PEG<sub>2K</sub> system.

| Contribution<br>(kJ mol <sup>-1</sup> ) | DTX-SCS-<br>DTX | DTX-SSS-<br>DTX | DTX-SSeS-<br>DTX | DTX-STeS-<br>DTX |
|-----------------------------------------|-----------------|-----------------|------------------|------------------|
| $\Delta E_{\text{vdW}}$                 | -13032.8        | -14887.9        | -15736.9         | -16832.9         |
| $\Delta E_{\text{elec}}$                | -1123.1         | -1205.2         | -1324.7          | -1407.8          |
| $\Delta G_{\text{polar}}$               | 5251.0          | 5846.6          | 5364.5           | 5443.9           |
| $\Delta G_{\text{nonpolar}}$            | -1071.2         | -1225.7         | -1351.7          | -1458.9          |
| $\Delta G_{\text{total}}$               | -9976.1         | -11472.2        | -13048.8         | -14255.7         |

Total binding energy ( $\Delta G_{\text{total}}$ ) = Van der Waals ( $\Delta E_{\text{vdW}}$ ) + Electrostatic energy ( $\Delta E_{\text{elec}}$ )  
+ Polarization solvation energy ( $\Delta G_{\text{polar}}$ ) + Nonpolarized solvation energy ( $\Delta G_{\text{nonpolar}}$ )

**Supplementary Table 3.** IC<sub>50</sub> values (nM) of Taxol and HPNAs against three tumor cell lines and one normal cell line.

| Cell lines | Taxotere   | DTX-STeS-DTX<br>NPs | DTX-SSeS-<br>DTX NPs | DTX-SSS-DTX<br>NPs | DTX-SCS-DTX<br>NPs |
|------------|------------|---------------------|----------------------|--------------------|--------------------|
| 4T1        | 2.11±0.24  | 10.19±0.66          | 15.55±1.11           | 29.44±1.92         | 78.38±3.06         |
| B16-F10    | 2.28±0.35  | 6.83±0.29           | 10.80±0.61           | 16.17±4.79         | 43.94±12.17        |
| Hepa 1-6   | 11.11±1.67 | 18.45±1.52          | 37.55±2.80           | 54.81±7.23         | 83.84±4.91         |
| 3T3        | 28.39±7.34 | 392.50±102.07       | 378.67±86.52         | 1007.13±26.55      | 3520.00±699.88     |

Data are presented as mean ± SD (n = 3 independent experiments).

**Supplementary Table 4.** The selectivity index (SI) of Taxotere and HPNAs between normal cells and tumor cells.

| Cell lines | Taxotere | DTX-STeS-DTX NPs | DTX-SSeS-DTX NPs | DTX-SSS-DTX NPs | DTX-SCS-DTX NPs |
|------------|----------|------------------|------------------|-----------------|-----------------|
| 4T1        | 11.85    | 32.78            | 26.71            | 35.70           | 43.79           |
| B16-F10    | 12.15    | 57.30            | 38.07            | 64.37           | 78.14           |
| Hepa 1-6   | 2.52     | 21.29            | 10.97            | 23.88           | 40.86           |

SI=(IC<sub>50normal</sub>)/(IC<sub>50tumor</sub>). (“IC<sub>50normal</sub> and IC<sub>50tumor</sub>” represent the IC<sub>50</sub> of HPNAs toward normal cells and tumor cells).

**Supplementary Table 5.** Pharmacokinetic parameters of Taxotere and HPNAs.

| Formulations        | Drug <sup>a)</sup> | AUC <sub>0-24h</sub> <sup>b)</sup> | CL <sup>c)</sup> | MRT <sub>0-24h</sub> <sup>d)</sup> |
|---------------------|--------------------|------------------------------------|------------------|------------------------------------|
| Taxotere            | DTX                | 0.46±0.09                          | 8.74±1.69        | 2.31±0.70                          |
| DTX-STeS-DTX<br>NPs | DTX-STeS-DTX       | 14.71±1.82                         | 0.27±0.03        | 0.10±0.01                          |
|                     | DTX                | 2.54±0.12                          | 1.50±0.13        | 2.20±0.40                          |
| DTX-SSeS-DTX<br>NPs | DTX-SSeS-DTX       | 14.54±5.90                         | 0.30±0.10        | 0.48±0.05                          |
|                     | DTX                | 2.26±0.17                          | 1.71±0.20        | 2.95±0.29                          |
| DTX-SSS-DTX<br>NPs  | DTX-SSS-DTX        | 14.65±2.48                         | 0.28±0.05        | 0.39±0.03                          |
|                     | DTX                | 0.71±0.06                          | 5.01±0.55        | 5.63±0.81                          |
| DTX-SCS-DTX<br>NPs  | DTX-SCS-DTX        | 58.58±4.68                         | 0.07±0.00        | 2.08±0.73                          |
|                     | DTX                | 0.18±0.03                          | 5.09±1.41        | 11.34±0.2                          |

a) Prodrugs and the released DTX were measured by LC-MS. b) Area under the plasma concentration-time curve (nmol h mL<sup>-1</sup>). c) Plasma clearance (mL h<sup>-1</sup> kg<sup>-1</sup>). d) Mean retention time (h). Data are presented as mean ± SD (n = 3 mice).
